# Supplementary material for: Generalization in Clinical Prediction Models: The Blessing and Curse of Measurement Indicator Variables
Source: PubMed Central journal article supplement — Crit Care Explor. 2021 Jun 25;3(7):e0453. doi: 10.1097/CCE.0000000000000453 (PMC8238368; doi:10.1097/cce.0000000000000453), 2021-06-25
Supplement: cc9-3-e0453-s001.pdf [file cc9-3-e0453-s001.pdf]

1 SUPPLEMENTAL DIGITAL CONTENT

2  
3 SUPPLEMENTAL FIGURE & TABLE CAPTIONS

4  
5 **Table E1: Vasopressor Breakdown per Cohort**

6 The table shows the set of all vasopressors considered when constructing our primary outcome:  
7 vasopressor onset. The table also shows the counts and percentages indicating how often each particular  
8 drug was the type of vasopressor initially administered within each data source. Note that values do not  
9 necessarily sum to 100%, as it is possible for multiple vasopressor types to be initially administered  
10 together. Phenylephrine was the main drug used at Beth Israel, while norepinephrine was most common  
11 at Methodist.

12  
13 **Table E2: Summary Statistics of All Modeled Variables with Missingness**

14 The table shows the full list of variables used by our predictive models, all of which exist in all data  
15 sources. Also listed are variable summaries for the specific development datasets to construct the models  
16 to predict onset of vasopressors 4 hours in advance. Median values along with 2.5%, 25%, 75%, and  
17 97.5% quantiles are shown for continuous values, while counts and percentages are shown for binary  
18 variables. Variable summaries are further broken down by the primary outcome, so that differences  
19 between cases and controls can be seen. The raw percentage of cases and controls where measurements  
20 were made can be seen, e.g. for the important variables that had statistically significant changes in model  
21 coefficient signs from Figure 3. The first variable shown (hours after admission) is not used in prediction  
22 models, but indicates the number of hours this prediction is being made. For instance, if vasopressors  
23 start at hour 20, this model's prediction was made at hour 16.

24  
25 **Table E3: Additional Qualitative Results from 4 Hour Onset Models**

26 The table shows additional quantitative results from the 4 hour onset models. Results from the 12  
27 different models are shown from evaluation on each of the 3 datasets. The table shows area under the  
28 ROC (AUROC) curves with 95% bootstrap confidence intervals, and bootstrap p-values from a one-sided  
29 test against the model with highest AUROC on each dataset. The rows with significantly highest  
30 AUROC values were always the combined model that was fit to the same dataset being evaluated on, so  
31 these rows are bolded throughout. We also show area under the precision-recall curves (AUPRs) with  
32 bootstrap confidence values, and positive predictive values (PPVs) at both 50% and 75% sensitivity, with  
33 bootstrap 95% confidence intervals. To measure calibration, we show the unscaled Brier score along with  
34 confidence intervals, and also P-values from the Hosmer-Lemeshow test for calibration. The null  
35 hypothesis is that there is adequate calibration (i.e. that observed event rates and predicted risks have no  
36 significant differences); low P-values indicate a lack of evidence that the null hypothesis is true.

37  
38 **Figure E1:** The diagram shows the consort diagrams outlining the filtering process for how we arrived at  
39 our final cohorts in each of the three datasets. We limited our analysis to adult patients (age  $\geq 18$  years)  
40 with lengths of stay between 6 and 600 hours, and exclude admissions where vasopressors are  
41 administered in the first 6 hours of a hospital admission or ICU stay.

42  
43 **Figure E2:** Histograms show the distribution of when during the course of hospital or ICU admission  
44 vasopressors were first administered, along with the randomly selected terminal times that were used for  
45 right aligning positive vasopressor cases with negative controls where no vasopressors were administered.  
46 Each pane shows histograms on a different data source. Vasopressors were most frequently administered  
47 earlier on.

48  
49 **Figure E3:** Calibration plots for the 4 hour models, after post-processing with isotonic regressions. For  
50 each evaluation data source, results on 12 different models are shown. Models with a name beginning  
51 with “A” were fit from the Methodist floor data, and appear in blue throughout. Models with a name

52 beginning with “B” were fit from the Methodist ICU data, and appear in green throughout. Models with a  
53 name beginning with “C” were fit from the Beth Israel ICU data, and appear in red throughout. Models  
54 with a name ending in “-1” are the combined models that use both physiologic and measurement indicator  
55 variables, both when fitting models and during evaluation; their lines are solid. Models with a name  
56 ending in “-2” are the combined models that use both physiologic and measurement indicator variables  
57 during model fitting, but only use physiologic variables during evaluation; their lines are dash-dotted.  
58 Models with a name ending in “-3” are the models solely using physiologic variables; their lines are  
59 dashed. Models with a name ending in “-4” are the models solely using the measurement indicator  
60 variables; their lines are dotted. Calibration is generally good.

61

62 **Figure E4:** Additional quantitative results for the 4 hour models. The top row shows ROC curves, and  
63 the bottom row shows precision-recall curves. For each evaluation data source, results on 12 different  
64 models are shown. Models with a name beginning with “A” were fit from the Methodist floor data, and  
65 appear in blue throughout. Models with a name beginning with “B” were fit from the Methodist ICU  
66 data, and appear in green throughout. Models with a name beginning with “C” were fit from the Beth  
67 Israel ICU data, and appear in red throughout. Models with a name ending in “-1” are the combined  
68 models that use both physiologic and measurement indicator variables, both when fitting models and  
69 during evaluation; their lines are solid. Models with a name ending in “-2” are the combined models that  
70 use both physiologic and measurement indicator variables during model fitting, but only use physiologic  
71 variables during evaluation; their lines are dash-dotted. Models with a name ending in “-3” are the  
72 models solely using physiologic variables; their lines are dashed. Models with a name ending in “-4” are  
73 the models solely using the measurement indicator variables; their lines are dotted. An important finding  
74 is that combined models always perform best, and models trained on the same dataset being evaluated  
75 also perform better than models learned from other data sources. For Beth Israel-derived models,  
76 generally the best model out-of-sample are models that were trained on both physiologic and indicator

77 features, but then only using physiologic features during evaluation. However, the combined models

78 derived from Methodist cohorts generally do best when validated externally.

79

Table E1

| Variable                                                                           | Methodist floor cohort | Methodist ICU cohort | Beth Israel ICU cohort |
|------------------------------------------------------------------------------------|------------------------|----------------------|------------------------|
| Total hospital/ICU admissions in cohort where vasopressor therapy was initiated, n | 539                    | 265                  | 1499                   |
| Dobutamine, n (%)                                                                  | 4 (0.7%)               | 0 (0.0%)             | 0 (0.0%)               |
| Dopamine, n (%)                                                                    | 81 (15.0%)             | 15 (5.7%)            | 125 (8.3%)             |
| Epinephrine, n (%)                                                                 | 16 (3.0%)              | 7 (2.6%)             | 79 (5.3%)              |
| Isoproterenol, n (%)                                                               | 5 (0.9%)               | 2 (0.8%)             | 0 (0.0%)               |
| Norepinephrine, n (%)                                                              | 420 (77.9%)            | 233 (87.9%)          | 389 (26.0%)            |
| Phenylephrine, n(%)                                                                | 19 (3.5%)              | 10 (3.8%)            | 954 (63.6%)            |

Table E2

| Continuous vars: median (5%, 25%, 75%, 95% quantiles)<br>Proportion vars: n (%) | Methodist General Floor Cohort, 539 Positive Cases (0.9%) | Methodist General Floor Cohort, 59211 Negative Controls (99.1%) | Methodist ICU Cohort, 265 Positive Cases (12.4%) | Methodist ICU Cohort, 1872 Negative Controls (87.6%) | Beth Israel ICU Cohort, 1499 Positive Cases (11.5%) | Beth Israel ICU Cohort, 11500 Negative Controls (88.5%) |
|---------------------------------------------------------------------------------|-----------------------------------------------------------|-----------------------------------------------------------------|--------------------------------------------------|------------------------------------------------------|-----------------------------------------------------|---------------------------------------------------------|
| Hours after admission to hospital/ICU                                           | 28.4 (2.8, 8.9, 94.9, 244.6)                              | 22.0 (3.1, 9.5, 46.0, 126.0)                                    | 73.5 (4.5, 21.3, 163.0, 316.6)                   | 86.3 (11.0, 41.5, 164.0, 369.8)                      | 14.7 (2.4, 5.0, 42.4, 160.9)                        | 15.7 (3.2, 8.3, 31.4, 91.8)                             |
| Age                                                                             | 65.0 (35.9, 55.0, 74.0, 86.0)                             | 59.0 (24.0, 42.0, 71.0, 87.0)                                   | 63.0 (34.0, 54.0, 70.0, 85.8)                    | 62.0 (30.6, 52.0, 71.0, 84.0)                        | 67.1 (37.8, 56.6, 77.9, 88.3)                       | 64.1 (27.9, 51.1, 77.8, 90.0)                           |
| Arterial diastolic blood pressure                                               | 60.0 (55.8, 60.0, 60.0, 61.1)                             | 60.0 (60.0, 60.0, 60.0, 60.0)                                   | 60.0 (47.0, 60.0, 60.0, 73.4)                    | 60.0 (52.0, 60.0, 60.0, 79.4)                        | 60.0 (44.0, 60.0, 60.0, 78.1)                       | 60.0 (51.0, 60.0, 60.0, 76.0)                           |
| Noninvasive diastolic blood pressure                                            | 62.0 (42.0, 55.0, 75.0, 90.1)                             | 71.0 (55.0, 61.0, 81.0, 96.0)                                   | 61.0 (41.0, 52.0, 71.0, 89.0)                    | 72.0 (51.0, 63.0, 83.0, 99.0)                        | 60.0 (39.0, 52.0, 65.0, 86.0)                       | 62.0 (43.0, 55.0, 73.0, 90.0)                           |
| ALT                                                                             | 34.0 (26.0, 34.0, 34.0, 57.0)                             | 34.0 (34.0, 34.0, 34.0, 34.0)                                   | 34.0 (13.0, 29.0, 34.0, 261.4)                   | 34.0 (13.0, 34.0, 34.0, 103.4)                       | 34.0 (11.0, 20.0, 37.0, 138.0)                      | 34.0 (11.0, 22.0, 34.0, 135.0)                          |
| Arterial MAP                                                                    | 85.0 (77.9, 85.0, 85.0, 85.0)                             | 85.0 (85.0, 85.0, 85.0, 85.0)                                   | 85.0 (64.0, 85.0, 85.0, 96.8)                    | 85.0 (71.0, 85.0, 85.0, 105.0)                       | 85.0 (60.0, 77.0, 85.0, 102.0)                      | 85.0 (70.0, 85.0, 85.0, 99.0)                           |
| MAP                                                                             | 85.0 (64.9, 82.5, 85.0, 108.0)                            | 85.0 (80.0, 85.0, 85.0, 112.0)                                  | 80.0 (58.0, 70.0, 97.0, 115.8)                   | 94.5 (69.0, 84.0, 107.0, 127.0)                      | 76.0 (52.0, 64.0, 85.0, 99.0)                       | 79.0 (57.0, 69.0, 86.0, 103.0)                          |
| Arterial SBP                                                                    | 120.0 (109.9, 120.0, 120.0, 120.5)                        | 120.0 (120.0, 120.0, 120.0, 120.0)                              | 120.0 (92.2, 120.0, 120.0, 145.0)                | 120.0 (101.0, 120.0, 120.0, 161.0)                   | 120.0 (91.0, 114.0, 120.0, 147.1)                   | 120.0 (105.0, 120.0, 120.0, 147.0)                      |
| Arterial SBP measured in last hour                                              | 38 (7.1%)                                                 | 368 (0.6%)                                                      | 42 (15.8%)                                       | 119 (6.4%)                                           | 507 (33.8%)                                         | 2462 (21.4%)                                            |
| Arterial SBP ever measured                                                      | 66 (12.2%)                                                | 1301 (2.2%)                                                     | 69 (26.0%)                                       | 428 (22.9%)                                          | 689 (46.0%)                                         | 3174 (27.6%)                                            |
| SBP                                                                             | 113.0 (84.9, 97.0, 130.5, 155.0)                          | 127.0 (98.0, 114.0, 144.0, 168.0)                               | 111.0 (81.0, 94.0, 129.0, 155.8)                 | 130.0 (95.0, 114.0, 146.0, 170.4)                    | 120.0 (83.0, 100.0, 122.0, 150.0)                   | 120.0 (91.0, 108.0, 134.0, 159.0)                       |
| SBP measured in last hour                                                       | 307 (57.0%)                                               | 18432 (31.1%)                                                   | 223 (84.2%)                                      | 1399 (74.7%)                                         | 643 (42.9%)                                         | 8539 (74.3%)                                            |
| AST                                                                             | 40.0 (26.0, 40.0, 40.0, 93.4)                             | 40.0 (40.0, 40.0, 40.0, 40.0)                                   | 40.0 (14.2, 40.0, 47.0, 322.8)                   | 40.0 (14.0, 40.0, 40.0, 115.9)                       | 40.0 (16.0, 26.0, 50.0, 240.0)                      | 40.0 (15.0, 27.0, 40.0, 162.0)                          |
| AST measured in last hour                                                       | 10 (1.9%)                                                 | 38 (0.1%)                                                       | 5 (1.9%)                                         | 11 (0.6%)                                            | 42 (2.8%)                                           | 194 (1.7%)                                              |
| AST measured in last 8 hours                                                    | 35 (6.5%)                                                 | 334 (0.6%)                                                      | 38 (14.3%)                                       | 108 (5.8%)                                           | 525 (35.0%)                                         | 2457 (21.4%)                                            |

|                                          |                                   |                                    |                                   |                                   |                                   |                                   |
|------------------------------------------|-----------------------------------|------------------------------------|-----------------------------------|-----------------------------------|-----------------------------------|-----------------------------------|
| Heart rate                               | 86.0 (60.0, 73.0, 100.0, 127.1)   | 80.0 (58.0, 70.0, 90.0, 108.0)     | 91.0 (60.0, 78.0, 105.0, 132.8)   | 85.0 (59.0, 74.0, 97.0, 117.0)    | 86.0 (60.0, 77.0, 100.0, 125.0)   | 82.0 (57.0, 71.0, 94.0, 114.0)    |
| Heart rate measured in last hour         | 303 (56.2%)                       | 19127 (32.3%)                      | 224 (84.5%)                       | 1446 (77.2%)                      | 1065 (71.0%)                      | 11096 (96.5%)                     |
| BUN                                      | 23.0 (16.0, 23.0, 23.0, 52.0)     | 23.0 (23.0, 23.0, 23.0, 23.0)      | 23.0 (10.0, 18.0, 38.0, 71.8)     | 23.0 (7.0, 16.0, 29.0, 64.4)      | 23.0 (8.0, 15.0, 35.0, 74.1)      | 18.0 (7.0, 12.0, 27.0, 61.0)      |
| Total bilirubin                          | 0.9 (0.9, 0.9, 0.9, 1.4)          | 0.9 (0.7, 0.9, 0.9, 0.9)           | 0.9 (0.9, 0.9, 0.9, 6.3)          | 0.9 (0.4, 0.9, 0.9, 2.8)          | 0.9 (0.3, 0.5, 1.0, 7.1)          | 0.9 (0.2, 0.5, 0.9, 3.1)          |
| Total bilirubin measured in last hour    | 7 (1.3%)                          | 140 (0.2%)                         | 1 (0.4%)                          | 10 (0.5%)                         | 70 (4.7%)                         | 326 (2.8%)                        |
| Total bilirubin measured in last 8 hours | 16 (3.0%)                         | 1263 (2.1%)                        | 15 (5.7%)                         | 85 (4.5%)                         | 529 (35.3%)                       | 2510 (21.8%)                      |
| Creatinine                               | 1.0 (1.0, 1.0, 1.0, 3.3)          | 1.0 (0.8, 1.0, 1.0, 1.8)           | 1.2 (1.0, 1.0, 2.7, 7.2)          | 1.0 (0.6, 1.0, 1.8, 5.8)          | 1.0 (0.5, 0.8, 1.5, 4.1)          | 0.9 (0.5, 0.7, 1.2, 3.2)          |
| Creatinine measured in last hour         | 15 (2.8%)                         | 612 (1.0%)                         | 10 (3.8%)                         | 37 (2.0%)                         | 97 (6.5%)                         | 858 (7.5%)                        |
| Creatinine measured in last 8 hours      | 52 (9.6%)                         | 4616 (7.8%)                        | 53 (20.0%)                        | 328 (17.5%)                       | 1045 (69.7%)                      | 7226 (62.8%)                      |
| Glucose                                  | 120.0 (89.8, 120.0, 120.0, 172.2) | 120.0 (120.0, 120.0, 120.0, 120.0) | 120.0 (82.0, 108.0, 145.0, 228.4) | 120.0 (82.0, 106.0, 138.2, 234.0) | 127.0 (84.0, 108.0, 158.0, 235.2) | 123.0 (84.0, 104.0, 152.0, 230.0) |
| Glucose measured in last hour            | 16 (3.0%)                         | 133 (0.2%)                         | 12 (4.5%)                         | 30 (1.6%)                         | 587 (39.2%)                       | 2504 (21.8%)                      |
| Glucose measured in last 8 hours         | 66 (12.2%)                        | 1216 (2.1%)                        | 70 (26.4%)                        | 284 (15.2%)                       | 1402 (93.5%)                      | 9692 (84.3%)                      |
| Hematocrit                               | 30.2 (25.4, 30.2, 30.2, 38.6)     | 30.2 (30.2, 30.2, 30.2, 30.2)      | 30.2 (22.0, 25.7, 32.0, 41.4)     | 30.2 (22.8, 28.6, 33.5, 41.6)     | 30.9 (23.0, 27.3, 35.7, 42.0)     | 32.4 (24.0, 28.5, 36.7, 42.7)     |
| Hemoglobin                               | 10.2 (8.4, 10.2, 10.2, 12.7)      | 10.2 (10.2, 10.2, 10.2, 10.2)      | 10.2 (7.1, 8.4, 10.5, 13.6)       | 10.2 (7.5, 9.4, 11.0, 13.8)       | 10.4 (7.5, 9.2, 12.0, 14.2)       | 11.0 (7.9, 9.6, 12.5, 14.6)       |
| Hemoglobin measured in last hour         | 19 (3.5%)                         | 114 (0.2%)                         | 12 (4.5%)                         | 32 (1.7%)                         | 384 (25.6%)                       | 1321 (11.5%)                      |
| Hemoglobin measured in last 8 hours      | 66 (12.2%)                        | 1086 (1.8%)                        | 73 (27.5%)                        | 272 (14.5%)                       | 1156 (77.1%)                      | 7178 (62.4%)                      |
| FiO2                                     | 21.0 (21.0, 21.0, 21.0, 51.0)     | 21.0 (21.0, 21.0, 21.0, 21.0)      | 21.0 (21.0, 21.0, 40.0, 100.0)    | 21.0 (21.0, 21.0, 21.0, 50.0)     | 40.0 (21.0, 21.0, 50.0, 100.0)    | 21.0 (21.0, 21.0, 40.0, 70.0)     |

|                                      |                                    |                                    |                                    |                                    |                                    |                                    |
|--------------------------------------|------------------------------------|------------------------------------|------------------------------------|------------------------------------|------------------------------------|------------------------------------|
| FiO2 measured in last hour           | 21 (3.9%)                          | 91 (0.2%)                          | 31 (11.7%)                         | 101 (5.4%)                         | 257 (17.1%)                        | 867 (7.5%)                         |
| FiO2 measured in last 8 hours        | 41 (7.6%)                          | 146 (0.2%)                         | 49 (18.5%)                         | 137 (7.3%)                         | 743 (49.6%)                        | 3149 (27.4%)                       |
| Bicarbonate                          | 25.0 (19.0, 25.0, 25.0, 27.0)      | 25.0 (25.0, 25.0, 25.0)            | 25.0 (16.0, 21.0, 26.0, 30.0)      | 25.0 (20.0, 24.0, 27.0, 34.0)      | 25.0 (16.9, 22.0, 28.0, 32.0)      | 25.0 (18.0, 23.0, 28.0, 33.0)      |
| Bicarbonate measured in last hour    | 28 (5.2%)                          | 146 (0.2%)                         | 19 (7.2%)                          | 37 (2.0%)                          | 437 (29.2%)                        | 1071 (9.3%)                        |
| Bicarbonate measured in last 8 hours | 90 (16.7%)                         | 1290 (2.2%)                        | 90 (34.0%)                         | 306 (16.3%)                        | 1299 (86.7%)                       | 7675 (66.7%)                       |
| PCO2                                 | 40.0 (39.0, 40.0, 40.0, 43.0)      | 40.0 (40.0, 40.0, 40.0, 40.0)      | 40.0 (27.0, 40.0, 40.0, 51.0)      | 40.0 (31.0, 40.0, 40.0, 51.4)      | 40.0 (28.0, 36.0, 43.0, 55.0)      | 40.0 (31.0, 40.0, 40.0, 52.0)      |
| PO2                                  | 95.0 (74.0, 95.0, 95.0, 146.1)     | 95.0 (95.0, 95.0, 95.0, 95.0)      | 95.0 (58.2, 95.0, 95.0, 215.8)     | 95.0 (68.0, 95.0, 95.0, 226.9)     | 116.0 (57.9, 94.5, 229.5, 419.0)   | 95.0 (60.0, 95.0, 112.0, 247.0)    |
| PO2 measured in last hour            | 17 (3.2%)                          | 27 (0.0%)                          | 9 (3.4%)                           | 7 (0.4%)                           | 381 (25.4%)                        | 294 (2.6%)                         |
| PO2 measured in last 8 hours         | 57 (10.6%)                         | 253 (0.4%)                         | 38 (14.3%)                         | 53 (2.8%)                          | 981 (65.4%)                        | 2384 (20.7%)                       |
| Potassium                            | 4.1 (3.6, 4.1, 4.1, 4.8)           | 4.1 (4.0, 4.1, 4.1, 4.1)           | 4.1 (3.2, 3.7, 4.3, 5.3)           | 4.1 (3.2, 3.7, 4.1, 4.8)           | 4.1 (3.3, 3.8, 4.5, 5.4)           | 4.0 (3.3, 3.7, 4.3, 5.0)           |
| Potassium measured in last hour      | 21 (3.9%)                          | 140 (0.2%)                         | 12 (4.5%)                          | 34 (1.8%)                          | 342 (22.8%)                        | 965 (8.4%)                         |
| Potassium measured in last 8 hours   | 75 (13.9%)                         | 1280 (2.2%)                        | 75 (28.3%)                         | 297 (15.9%)                        | 1231 (82.1%)                       | 7618 (66.2%)                       |
| Sodium                               | 140.0 (135.0, 140.0, 140.0, 144.0) | 140.0 (140.0, 140.0, 140.0, 140.0) | 140.0 (132.0, 138.0, 142.0, 149.0) | 140.0 (134.0, 139.0, 142.0, 149.0) | 138.0 (130.0, 135.0, 141.0, 146.0) | 139.0 (132.0, 136.0, 141.0, 145.0) |
| Lactate                              | 1.0 (1.0, 1.0, 1.0, 2.1)           | 1.0 (1.0, 1.0, 1.0, 1.0)           | 1.0 (1.0, 1.0, 1.2, 5.7)           | 1.0 (1.0, 1.0, 1.0, 2.2)           | 1.5 (0.8, 1.0, 2.2, 4.4)           | 1.0 (0.8, 1.0, 1.7, 3.1)           |
| Lactate measured in last hour        | 9 (1.7%)                           | 8 (0.0%)                           | 5 (1.9%)                           | 3 (0.2%)                           | 219 (14.6%)                        | 195 (1.7%)                         |
| Lactate measured in last 8 hours     | 24 (4.5%)                          | 111 (0.2%)                         | 32 (12.1%)                         | 26 (1.4%)                          | 901 (60.1%)                        | 2433 (21.2%)                       |
| Lactate ever measured                | 48 (8.9%)                          | 556 (0.9%)                         | 76 (28.7%)                         | 309 (16.5%)                        | 1295 (86.4%)                       | 7298 (63.5%)                       |
| Magnesium                            | 2.0 (1.9, 2.0, 2.0, 2.2)           | 2.0 (2.0, 2.0, 2.0, 2.0)           | 2.0 (1.7, 2.0, 2.1, 2.6)           | 2.0 (1.7, 2.0, 2.1, 2.6)           | 2.0 (1.5, 1.9, 2.1, 2.6)           | 2.0 (1.6, 1.9, 2.1, 2.5)           |
| Magnesium                            | 9 (1.7%)                           | 59 (0.1%)                          | 6 (2.3%)                           | 19 (1.0%)                          | 94 (6.3%)                          | 824 (7.2%)                         |



|                                        |                                    |                                    |                                   |                                   |                                   |                                   |
|----------------------------------------|------------------------------------|------------------------------------|-----------------------------------|-----------------------------------|-----------------------------------|-----------------------------------|
| measured in last hour                  |                                    |                                    |                                   |                                   |                                   |                                   |
| Magnesium measured in last 8 hours     | 36 (6.7%)                          | 600 (1.0%)                         | 40 (15.1%)                        | 154 (8.2%)                        | 734 (49.0%)                       | 5729 (49.8%)                      |
| Platelets                              | 208.0 (110.0, 208.0, 208.0, 229.5) | 208.0 (165.0, 208.0, 208.0, 277.0) | 208.0 (50.4, 144.0, 218.0, 366.2) | 208.0 (77.0, 155.0, 249.0, 415.8) | 202.0 (63.0, 138.0, 272.0, 462.8) | 214.0 (77.0, 162.0, 282.0, 438.0) |
| Respiration Rate                       | 18.0 (12.0, 16.0, 20.0, 30.0)      | 18.0 (16.0, 18.0, 18.0, 20.0)      | 19.0 (12.0, 16.0, 25.0, 33.8)     | 18.0 (13.0, 16.0, 20.0, 26.0)     | 19.0 (12.0, 17.0, 24.0, 32.0)     | 18.0 (11.0, 15.0, 22.0, 28.0)     |
| Respiration Rate measured in last hour | 266 (49.4%)                        | 16909 (28.6%)                      | 167 (63.0%)                       | 1073 (57.3%)                      | 1057 (70.5%)                      | 11029 (95.9%)                     |
| SpO2                                   | 95.0 (92.0, 95.0, 96.0, 100.0)     | 95.0 (95.0, 95.0, 95.0, 98.0)      | 97.0 (88.2, 95.0, 100.0, 100.0)   | 97.0 (89.6, 95.0, 99.0, 100.0)    | 97.0 (92.0, 95.0, 99.0, 100.0)    | 97.0 (92.0, 95.0, 99.0, 100.0)    |
| SpO2 measured in last hour             | 169 (31.4%)                        | 3713 (6.3%)                        | 184 (69.4%)                       | 1137 (60.7%)                      | 1043 (69.6%)                      | 10853 (94.4%)                     |
| WBC                                    | 9.0 (7.2, 9.0, 9.0, 17.0)          | 9.0 (9.0, 9.0, 9.0, 9.0)           | 9.0 (4.2, 8.5, 13.2, 23.7)        | 9.0 (4.8, 8.5, 11.3, 19.3)        | 10.4 (4.2, 7.8, 14.8, 23.1)       | 9.6 (4.1, 7.3, 12.8, 20.5)        |
| WBC measured in last hour              | 14 (2.6%)                          | 102 (0.2%)                         | 14 (5.3%)                         | 31 (1.7%)                         | 115 (7.7%)                        | 768 (6.7%)                        |
| WBC measured in last 8 hours           | 60 (11.1%)                         | 1021 (1.7%)                        | 73 (27.5%)                        | 269 (14.4%)                       | 1009 (67.3%)                      | 6752 (58.7%)                      |
| Weight                                 | 82.0 (58.4, 82.0, 82.0, 113.4)     | 82.0 (68.0, 82.0, 82.0, 97.2)      | 82.0 (56.0, 69.9, 90.4, 125.9)    | 82.0 (51.1, 69.2, 93.0, 127.1)    | 82.0 (53.0, 71.0, 87.2, 118.0)    | 80.6 (51.0, 66.6, 90.2, 119.0)    |
| Weight measured in last hour           | 11 (2.0%)                          | 251 (0.4%)                         | 8 (3.0%)                          | 28 (1.5%)                         | 60 (4.0%)                         | 401 (3.5%)                        |
| Weight measured in last 8 hours        | 73 (13.5%)                         | 2670 (4.5%)                        | 67 (25.3%)                        | 191 (10.2%)                       | 511 (34.1%)                       | 3807 (33.1%)                      |
| GCS                                    | 15.0 (6.0, 14.0, 15.0, 15.0)       | 15.0 (14.0, 15.0, 15.0, 15.0)      | 15.0 (4.0, 10.0, 15.0, 15.0)      | 15.0 (6.0, 13.0, 15.0, 15.0)      | 14.0 (3.0, 9.0, 15.0, 15.0)       | 15.0 (7.0, 14.0, 15.0, 15.0)      |
| GCS measured in last hour              | 85 (15.8%)                         | 5253 (8.9%)                        | 47 (17.7%)                        | 364 (19.4%)                       | 369 (24.6%)                       | 3733 (32.5%)                      |
| Temperature                            | 36.8 (35.6, 36.5, 37.0, 37.9)      | 36.7 (36.2, 36.5, 37.0, 37.4)      | 36.9 (35.5, 36.6, 37.3, 38.3)     | 36.9 (36.3, 36.6, 37.1, 37.8)     | 37.0 (35.6, 36.4, 37.3, 38.4)     | 36.8 (35.7, 36.3, 37.2, 37.9)     |
| Temperature measured in last hour      | 148 (27.5%)                        | 12675 (21.4%)                      | 76 (28.7%)                        | 563 (30.1%)                       | 364 (24.3%)                       | 3128 (27.2%)                      |

Table E3

| Evaluation Dataset     | Model Training Dataset | Features Used in Training      | Features Used in Evaluation    | AUROC (95%CI)               | Bootstrap AUROC P-value | AUPR (95%CI)                | PPV at 50% Sens (95% CI)    | PPV at 75% Sens (95% CI)    | Brier Score (95% CI)        | Hosmer-Lemeshow P-value |
|------------------------|------------------------|--------------------------------|--------------------------------|-----------------------------|-------------------------|-----------------------------|-----------------------------|-----------------------------|-----------------------------|-------------------------|
| <b>Methodist Floor</b> | <b>Methodist Floor</b> | <b>Values &amp; Indicators</b> | <b>Values &amp; Indicators</b> | <b>0.862 (0.844, 0.879)</b> | -                       | <b>0.115 (0.095, 0.139)</b> | <b>0.098 (0.081, 0.120)</b> | <b>0.038 (0.030, 0.049)</b> | <b>0.008 (0.008, 0.009)</b> | <b>0.134</b>            |
|                        | Methodist Floor        | Values & Indicators            | Only Values                    | 0.829 (0.809, 0.847)        | <0.001                  | 0.089 (0.076, 0.109)        | 0.075 (0.057, 0.102)        | 0.026 (0.021, 0.034)        | 0.009 (0.008, 0.009)        | 0.892                   |
|                        | Methodist Floor        | Only Values                    | Only Values                    | 0.842 (0.823, 0.860)        | 0.013                   | 0.094 (0.080, 0.114)        | 0.091 (0.071, 0.108)        | 0.029 (0.024, 0.038)        | 0.008 (0.008, 0.009)        | 0.108                   |
|                        | Methodist Floor        | Only Indicators                | Only Indicators                | 0.759 (0.736, 0.780)        | <0.001                  | 0.068 (0.051, 0.089)        | 0.039 (0.030, 0.044)        | 0.011 (0.010, 0.012)        | 0.009 (0.008, 0.009)        | 0.953                   |
|                        | Methodist ICU          | Values & Indicators            | Values & Indicators            | 0.766 (0.744, 0.790)        | <0.001                  | 0.091 (0.073, 0.114)        | 0.051 (0.040, 0.065)        | 0.015 (0.013, 0.019)        | 0.009 (0.008, 0.009)        | 0.487                   |
|                        | Methodist ICU          | Values & Indicators            | Only Values                    | 0.742 (0.718, 0.768)        | <0.001                  | 0.083 (0.067, 0.102)        | 0.044 (0.031, 0.059)        | 0.014 (0.012, 0.018)        | 0.009 (0.008, 0.009)        | 0.042                   |
|                        | Methodist ICU          | Only Values                    | Only Values                    | 0.755 (0.731, 0.780)        | <0.001                  | 0.092 (0.075, 0.115)        | 0.047 (0.037, 0.068)        | 0.015 (0.013, 0.019)        | 0.009 (0.008, 0.009)        | 0.016                   |
|                        | Methodist ICU          | Only Indicators                | Only Indicators                | 0.636 (0.609, 0.663)        | <0.001                  | 0.047 (0.034, 0.064)        | 0.018 (0.008, 0.032)        | 0.009 (0.008, 0.010)        | 0.009 (0.008, 0.010)        | 0.617                   |
|                        | Beth Israel ICU        | Values & Indicators            | Values & Indicators            | 0.698 (0.670, 0.723)        | <0.001                  | 0.054 (0.043, 0.070)        | 0.025 (0.020, 0.036)        | 0.012 (0.010, 0.013)        | 0.009 (0.008, 0.009)        | 0.114                   |
|                        | Beth Israel ICU        | Values & Indicators            | Only Values                    | 0.779 (0.755, 0.804)        | <0.001                  | 0.081 (0.067, 0.101)        | 0.064 (0.050, 0.081)        | 0.019 (0.016, 0.024)        | 0.009 (0.008, 0.009)        | 0.244                   |
|                        | Beth Israel ICU        | Only Values                    | Only Values                    | 0.773 (0.750, 0.797)        | <0.001                  | 0.060 (0.050, 0.072)        | 0.060 (0.048, 0.071)        | 0.019 (0.015, 0.023)        | 0.009 (0.008, 0.009)        | 0.383                   |
|                        | Beth Israel ICU        | Only Indicators                | Only Indicators                | 0.425 (0.399, 0.451)        | <0.001                  | 0.025 (0.015, 0.041)        | 0.007 (0.006, 0.007)        | 0.008 (0.007, 0.009)        | 0.009 (0.008, 0.010)        | 0.818                   |
| <b>Methodist ICU</b>   | Methodist Floor        | Values & Indicators            | Values & Indicators            | 0.748 (0.715, 0.782)        | <0.001                  | 0.342 (0.287, 0.402)        | 0.330 (0.263, 0.408)        | 0.204 (0.171, 0.253)        | 0.097 (0.087, 0.106)        | 0.270                   |
|                        | Methodist Floor        | Values & Indicators            | Only Values                    | 0.735 (0.699, 0.768)        | <0.001                  | 0.341 (0.285, 0.402)        | 0.330 (0.263, 0.418)        | 0.197 (0.164, 0.241)        | 0.097 (0.088, 0.107)        | 0.651                   |
|                        | Methodist Floor        | Only Values                    | Only Values                    | 0.735 (0.698, 0.769)        | <0.001                  | 0.347 (0.294, 0.407)        | 0.345 (0.249, 0.426)        | 0.199 (0.159, 0.254)        | 0.096 (0.087, 0.105)        | 0.112                   |
|                        | Methodist Floor        | Only Indicators                | Only Indicators                | 0.653 (0.615, 0.691)        | <0.001                  | 0.243 (0.203, 0.296)        | 0.211 (0.164, 0.270)        | 0.159 (0.129, 0.178)        | 0.105 (0.095, 0.114)        | 0.063                   |
|                        | <b>Methodist ICU</b>   | <b>Values &amp; Indicators</b> | <b>Values &amp; Indicators</b> | <b>0.822 (0.793, 0.852)</b> | -                       | <b>0.465 (0.407, 0.535)</b> | <b>0.463 (0.375, 0.569)</b> | <b>0.306 (0.251, 0.364)</b> | <b>0.086 (0.078, 0.095)</b> | <b>0.016</b>            |
|                        | Methodist ICU          | Values & Indicators            | Only Values                    | 0.778 (0.746, 0.810)        | 0.003                   | 0.410 (0.352, 0.475)        | 0.370 (0.319, 0.458)        | 0.244 (0.203, 0.299)        | 0.093 (0.084, 0.102)        | 0.063                   |
|                        | Methodist ICU          | Only Values                    | Only Values                    | 0.782 (0.749, 0.813)        | 0.005                   | 0.403 (0.345, 0.468)        | 0.361 (0.299, 0.460)        | 0.253 (0.209, 0.324)        | 0.092 (0.083, 0.101)        | 0.066                   |
|                        | Methodist ICU          | Only Indicators                | Only Indicators                | 0.717 (0.686, 0.748)        | <0.001                  | 0.311 (0.259, 0.372)        | 0.262 (0.212, 0.334)        | 0.183 (0.146, 0.213)        | 0.099 (0.089, 0.108)        | 0.552                   |

|                        |                        |                                |                     |                             |        |                             |                             |                             |                             |              |
|------------------------|------------------------|--------------------------------|---------------------|-----------------------------|--------|-----------------------------|-----------------------------|-----------------------------|-----------------------------|--------------|
|                        | Beth Israel ICU        | Values & Indicators            | Values & Indicators | 0.690 (0.654, 0.724)        | <0.001 | 0.242 (0.202, 0.290)        | 0.224 (0.176, 0.265)        | 0.184 (0.156, 0.213)        | 0.105 (0.095, 0.114)        | 0.384        |
|                        | Beth Israel ICU        | Values & Indicators            | Only Values         | 0.736 (0.702, 0.769)        | <0.001 | 0.319 (0.269, 0.376)        | 0.284 (0.233, 0.379)        | 0.216 (0.174, 0.250)        | 0.097 (0.087, 0.106)        | 0.023        |
|                        | Beth Israel ICU        | Only Values                    | Only Values         | 0.717 (0.684, 0.748)        | <0.001 | 0.253 (0.217, 0.304)        | 0.259 (0.215, 0.314)        | 0.198 (0.165, 0.241)        | 0.102 (0.093, 0.112)        | 0.310        |
|                        | Beth Israel ICU        | Only Indicators                | Only Indicators     | 0.538 (0.499, 0.578)        | <0.001 | 0.159 (0.131, 0.196)        | 0.146 (0.120, 0.173)        | 0.128 (0.113, 0.148)        | 0.108 (0.097, 0.118)        | 0.074        |
| <b>Beth Israel ICU</b> | Methodist Floor        | Values & Indicators            | Values & Indicators | 0.736 (0.722, 0.749)        | <0.001 | 0.301 (0.281, 0.325)        | 0.261 (0.237, 0.291)        | 0.194 (0.182, 0.206)        | 0.092 (0.088, 0.096)        | 0.121        |
|                        | Methodist Floor        | Values & Indicators            | Only Values         | 0.668 (0.654, 0.683)        | <0.001 | 0.241 (0.224, 0.263)        | 0.196 (0.177, 0.215)        | 0.149 (0.141, 0.159)        | 0.096 (0.092, 0.100)        | 0.363        |
|                        | Methodist Floor        | Only Values                    | Only Values         | 0.687 (0.672, 0.702)        | <0.001 | 0.259 (0.240, 0.282)        | 0.216 (0.193, 0.248)        | 0.155 (0.146, 0.164)        | 0.095 (0.091, 0.099)        | 0.577        |
|                        | Methodist Floor        | Only Indicators                | Only Indicators     | 0.727 (0.713, 0.740)        | <0.001 | 0.294 (0.274, 0.319)        | 0.279 (0.258, 0.315)        | 0.197 (0.179, 0.208)        | 0.092 (0.088, 0.095)        | 0.022        |
|                        | Methodist ICU          | Values & Indicators            | Values & Indicators | 0.772 (0.760, 0.785)        | <0.001 | 0.333 (0.310, 0.359)        | 0.305 (0.287, 0.324)        | 0.243 (0.224, 0.264)        | 0.089 (0.086, 0.093)        | 0.342        |
|                        | Methodist ICU          | Values & Indicators            | Only Values         | 0.656 (0.640, 0.672)        | <0.001 | 0.250 (0.232, 0.274)        | 0.201 (0.183, 0.218)        | 0.142 (0.135, 0.153)        | 0.096 (0.092, 0.100)        | 0.002        |
|                        | Methodist ICU          | Only Values                    | Only Values         | 0.677 (0.661, 0.693)        | <0.001 | 0.267 (0.247, 0.292)        | 0.216 (0.195, 0.240)        | 0.151 (0.141, 0.160)        | 0.095 (0.091, 0.099)        | 0.127        |
|                        | Methodist ICU          | Only Indicators                | Only Indicators     | 0.714 (0.701, 0.729)        | <0.001 | 0.269 (0.250, 0.292)        | 0.277 (0.261, 0.300)        | 0.169 (0.159, 0.198)        | 0.093 (0.089, 0.096)        | 0.238        |
|                        | <b>Beth Israel ICU</b> | <b>Values &amp; Indicators</b> | Values & Indicators | <b>0.889 (0.880, 0.898)</b> | -      | <b>0.589 (0.564, 0.618)</b> | <b>0.609 (0.571, 0.657)</b> | <b>0.415 (0.384, 0.438)</b> | <b>0.068 (0.065, 0.071)</b> | <b>0.156</b> |
|                        | Beth Israel ICU        | Values & Indicators            | Only Values         | 0.757 (0.744, 0.770)        | <0.001 | 0.340 (0.316, 0.367)        | 0.313 (0.284, 0.347)        | 0.194 (0.179, 0.207)        | 0.090 (0.086, 0.093)        | 0.103        |
|                        | Beth Israel ICU        | Only Values                    | Only Values         | 0.828 (0.817, 0.839)        | <0.001 | 0.386 (0.362, 0.415)        | 0.405 (0.377, 0.437)        | 0.292 (0.270, 0.317)        | 0.084 (0.081, 0.087)        | 0.525        |
|                        | Beth Israel ICU        | Only Indicators                | Only Indicators     | 0.827 (0.815, 0.838)        | <0.001 | 0.511 (0.486, 0.538)        | 0.466 (0.423, 0.505)        | 0.282 (0.263, 0.308)        | 0.076 (0.073, 0.080)        | 0.950        |

# Methodist Floor and ICU Cohorts

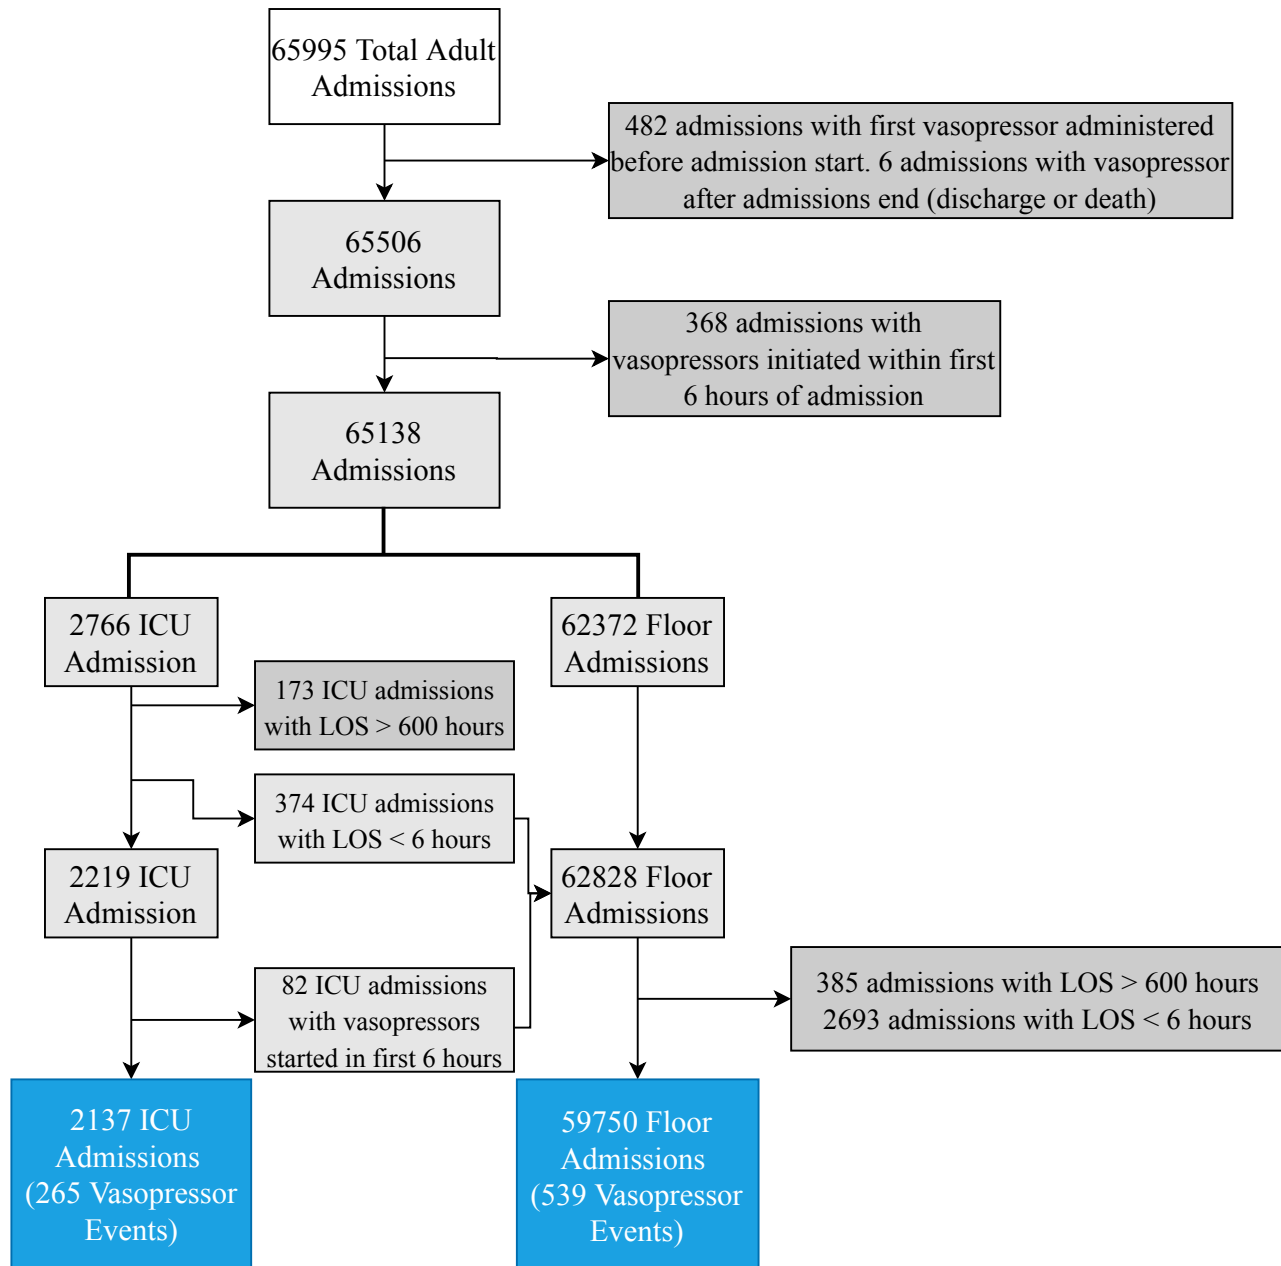

# Beth Israel ICU Cohort

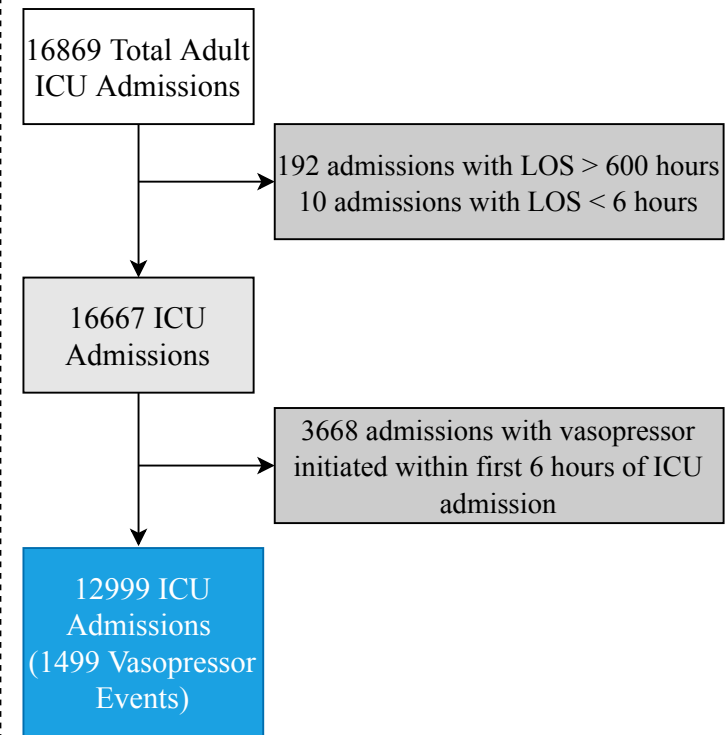

# Distribution of Vasopressor & Control Terminal Times Across Datasets

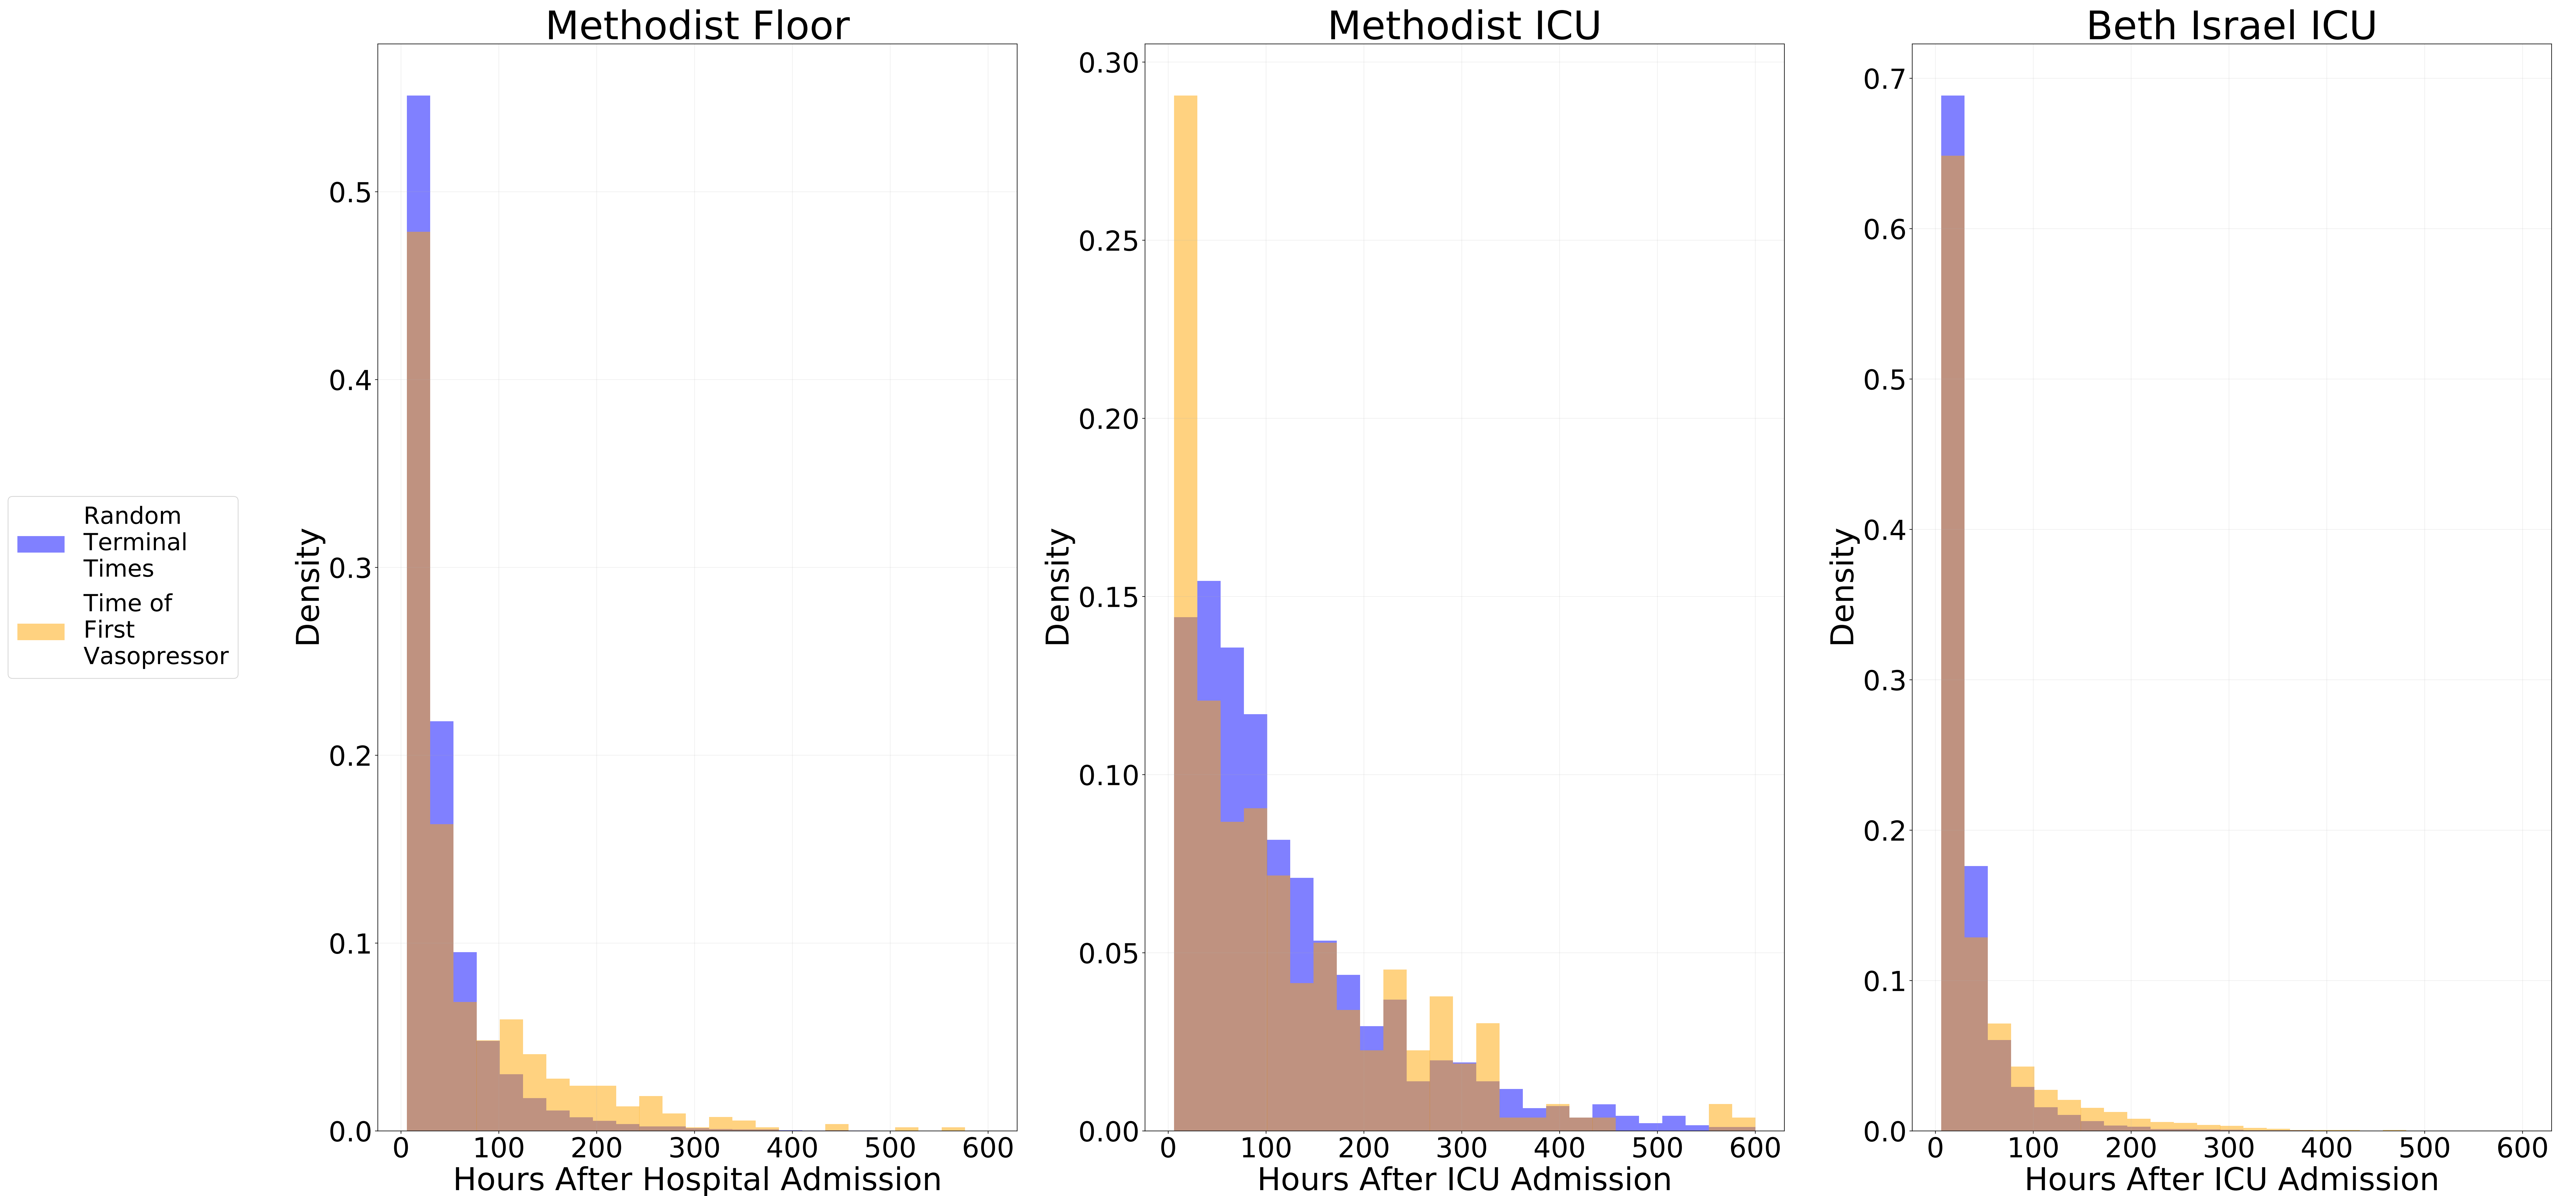

### Methodist Floor

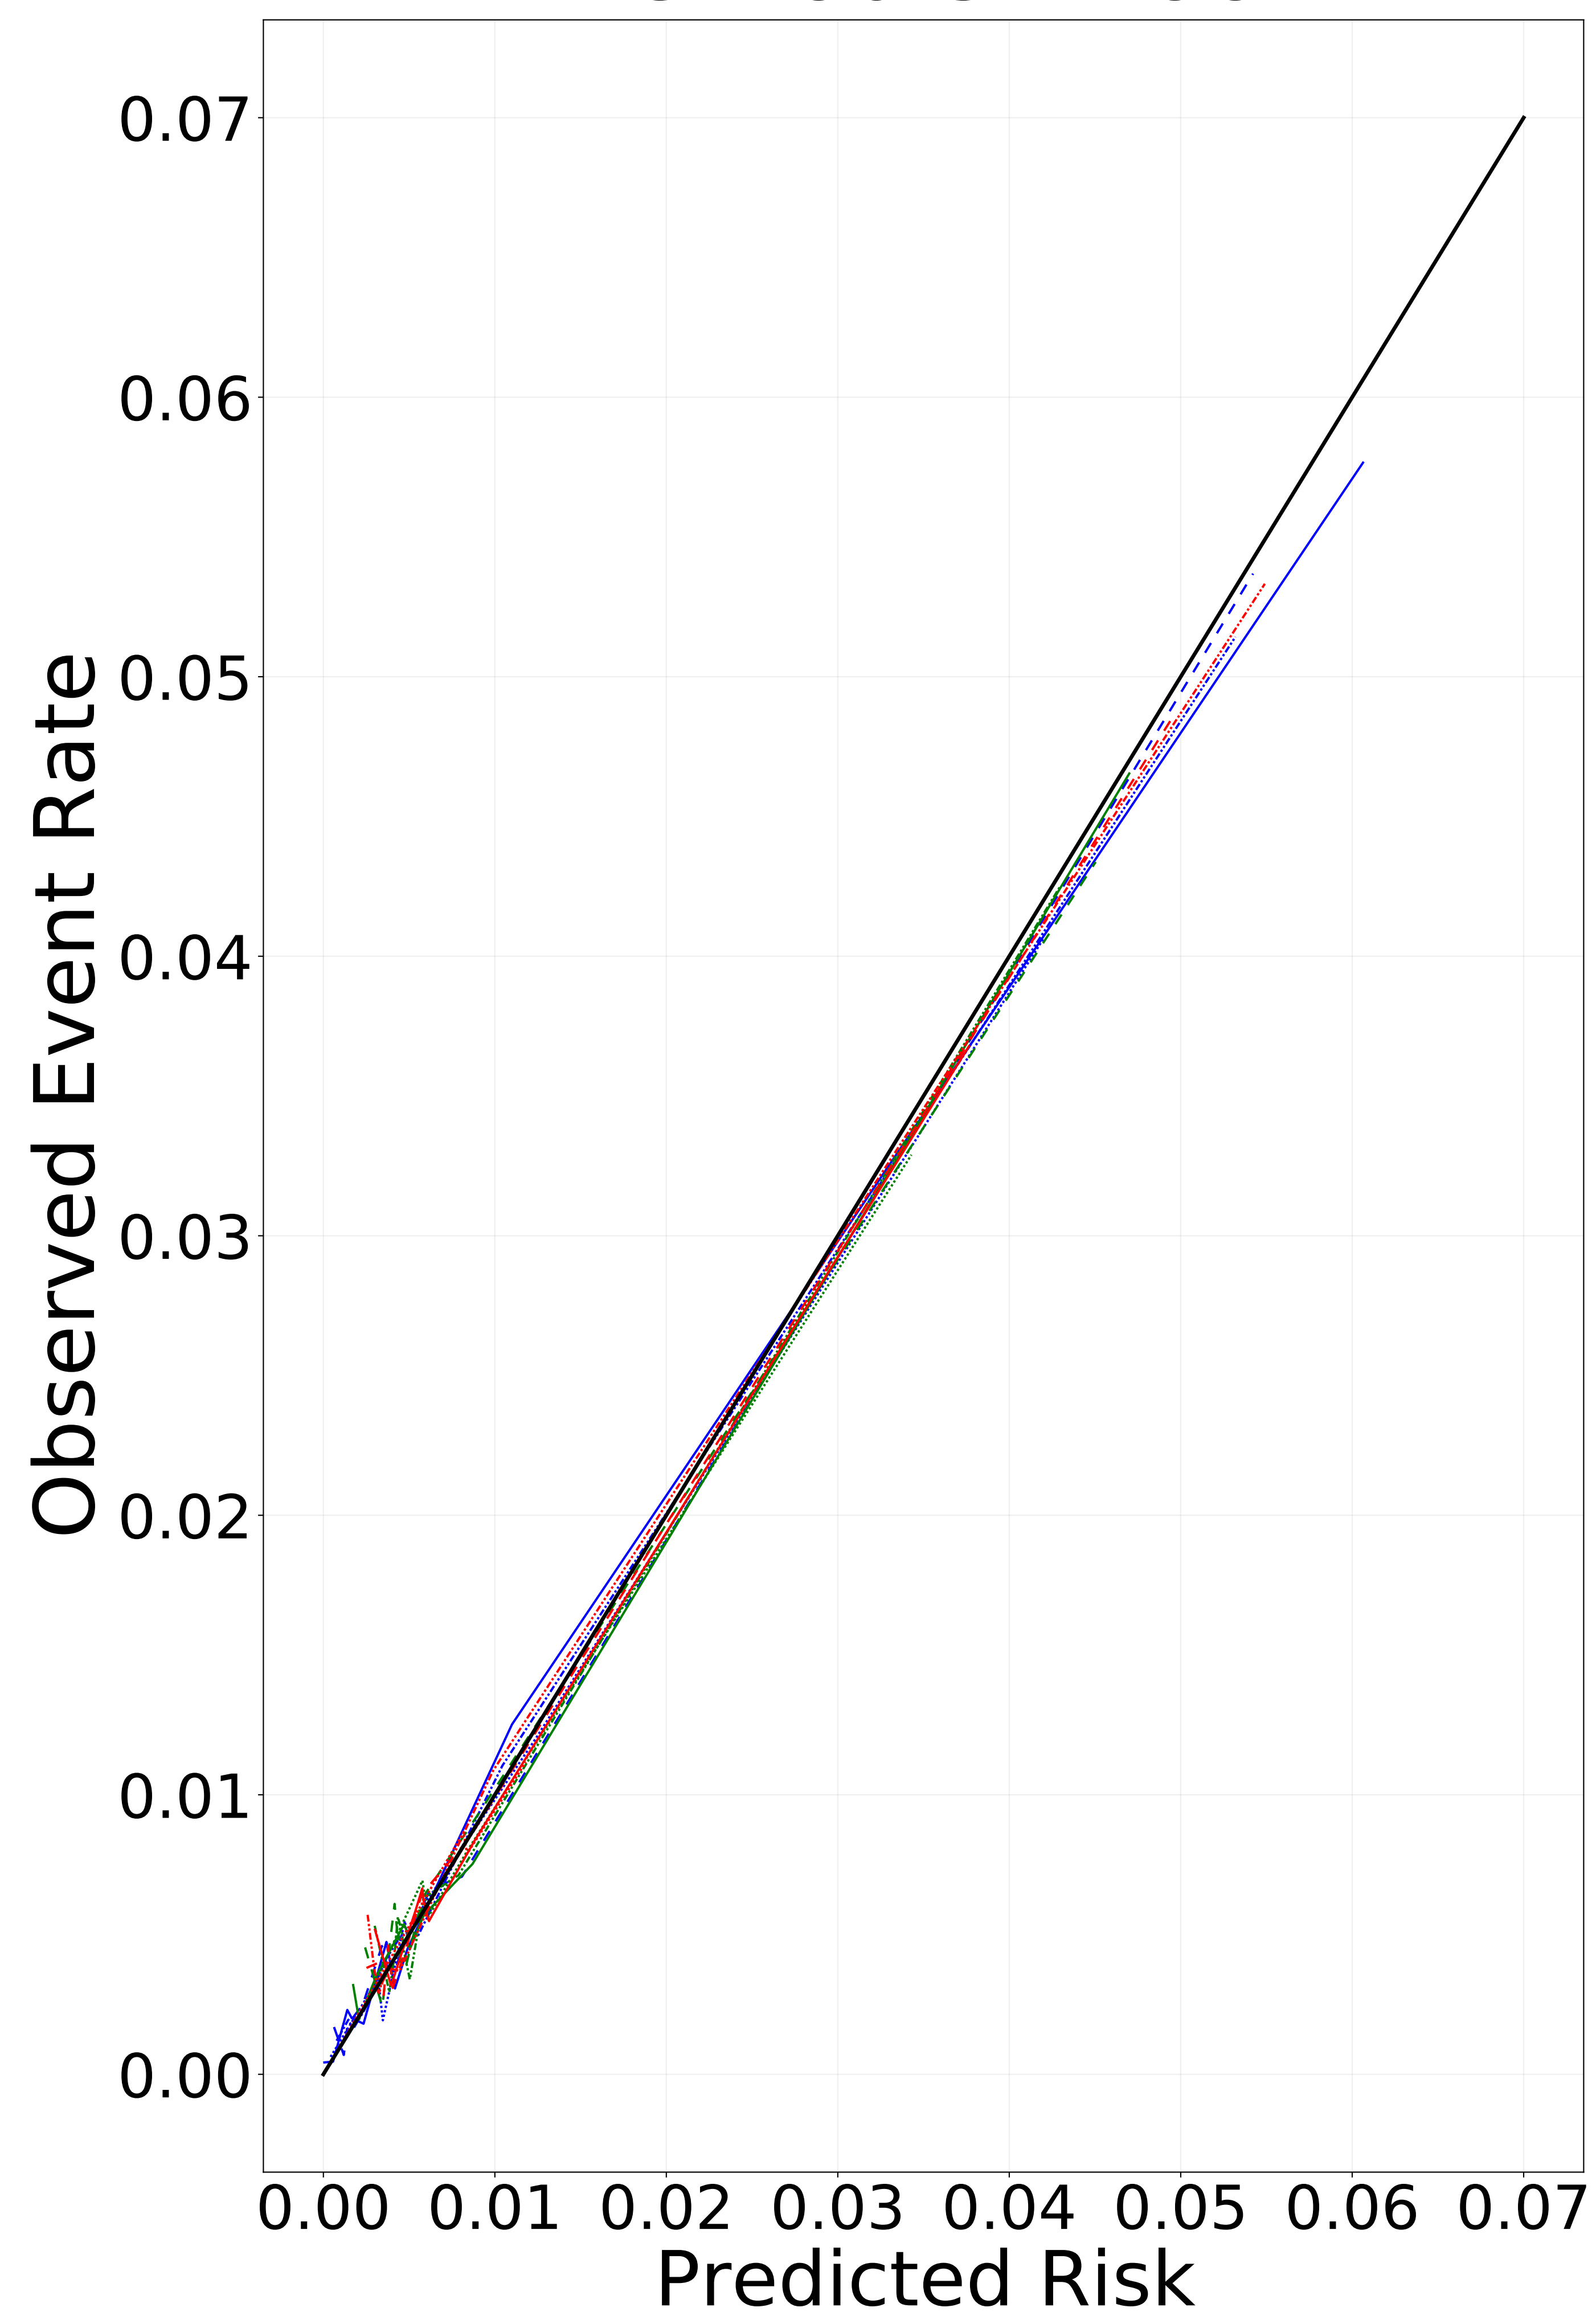

### Methodist ICU

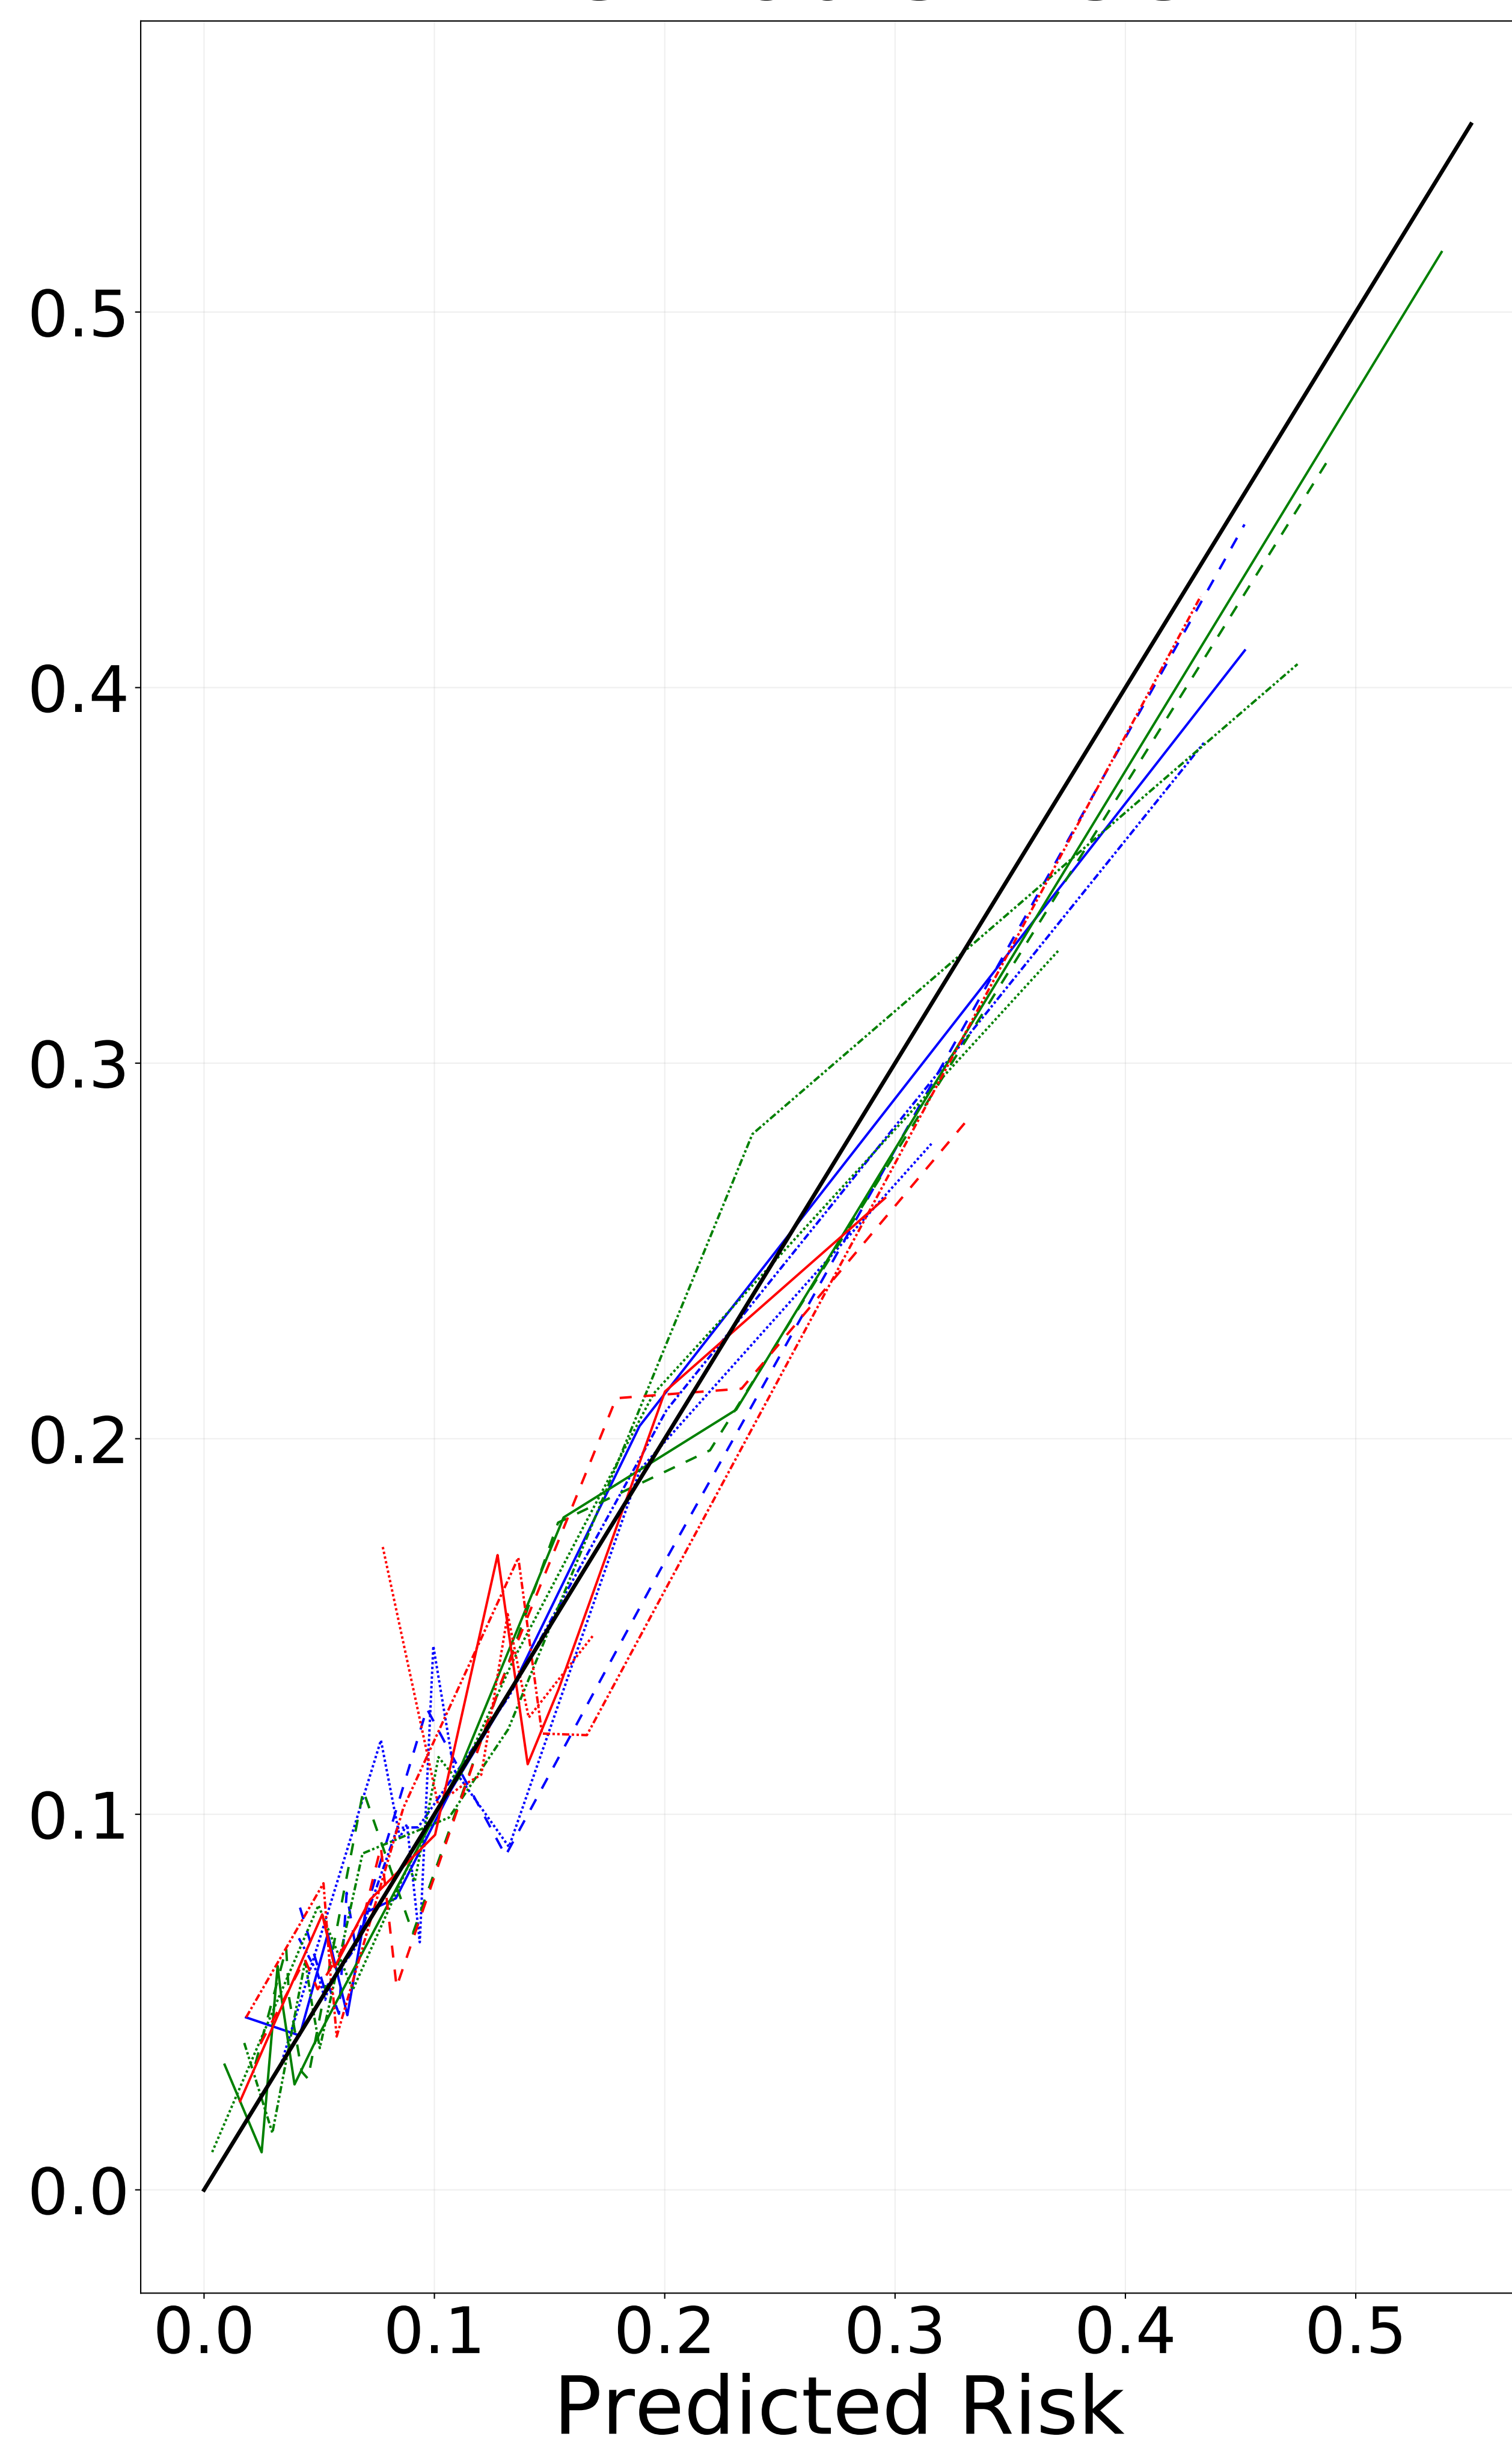

### Beth Israel ICU

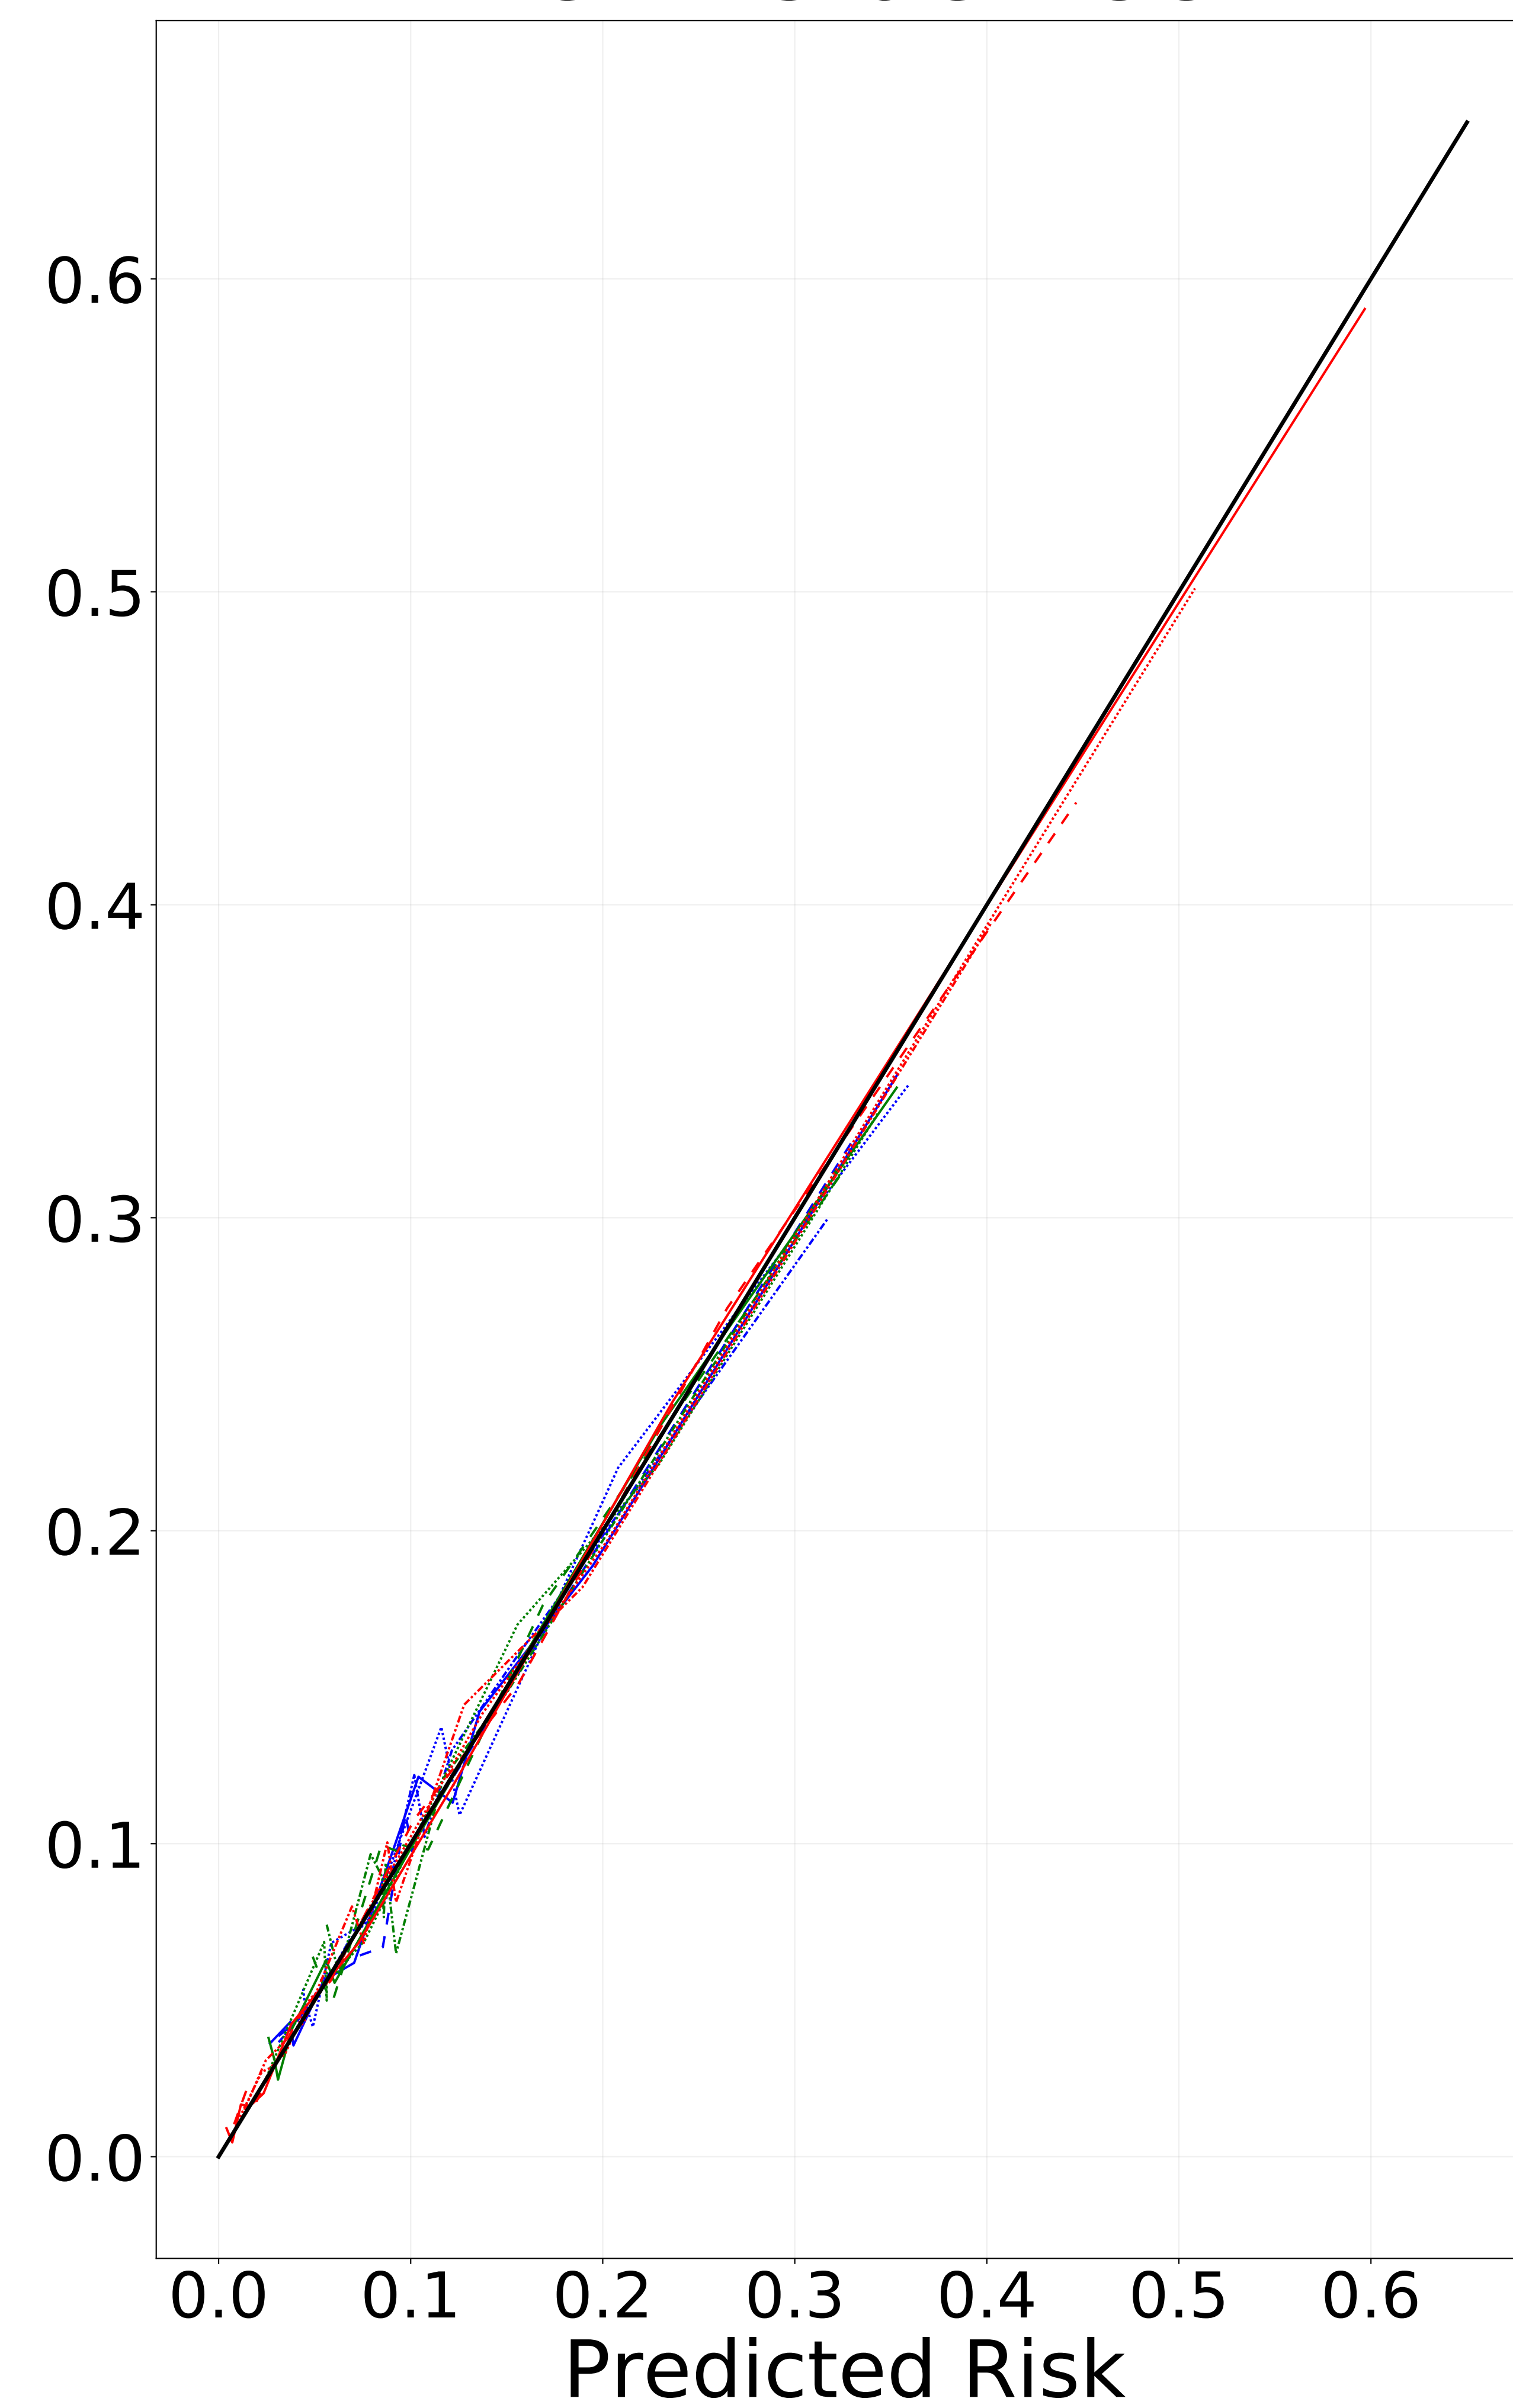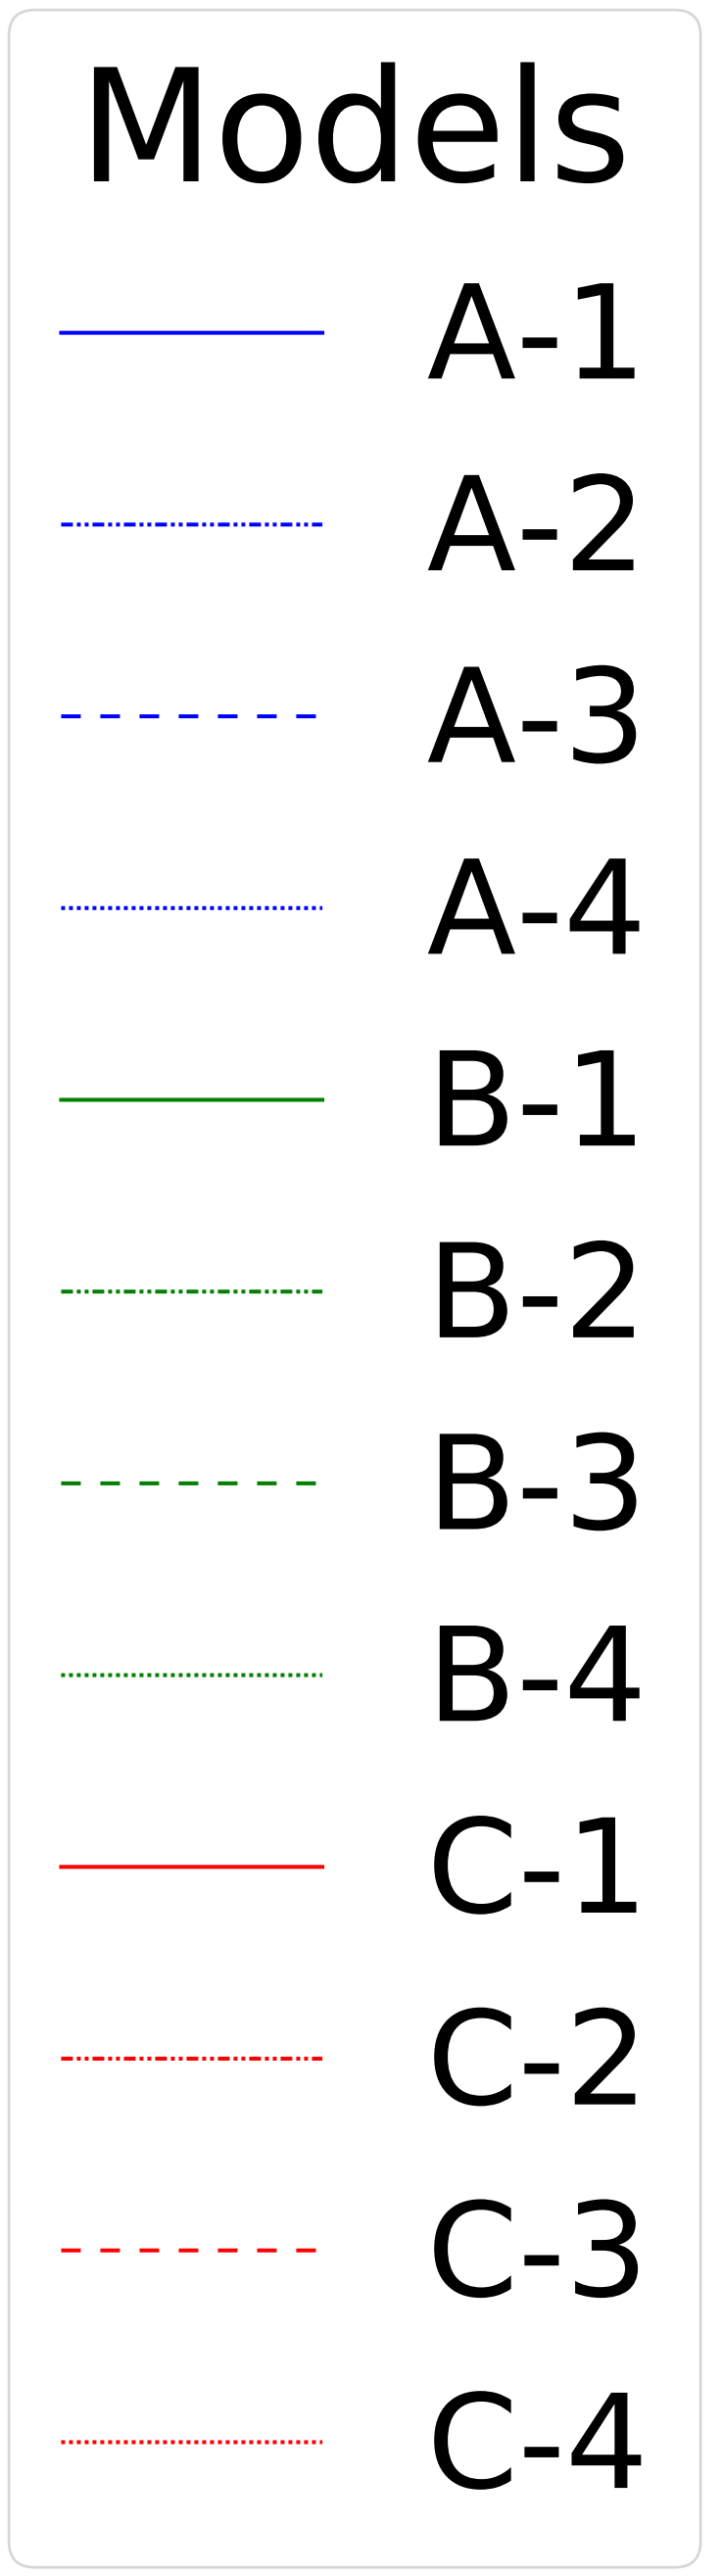

Methodist Floor

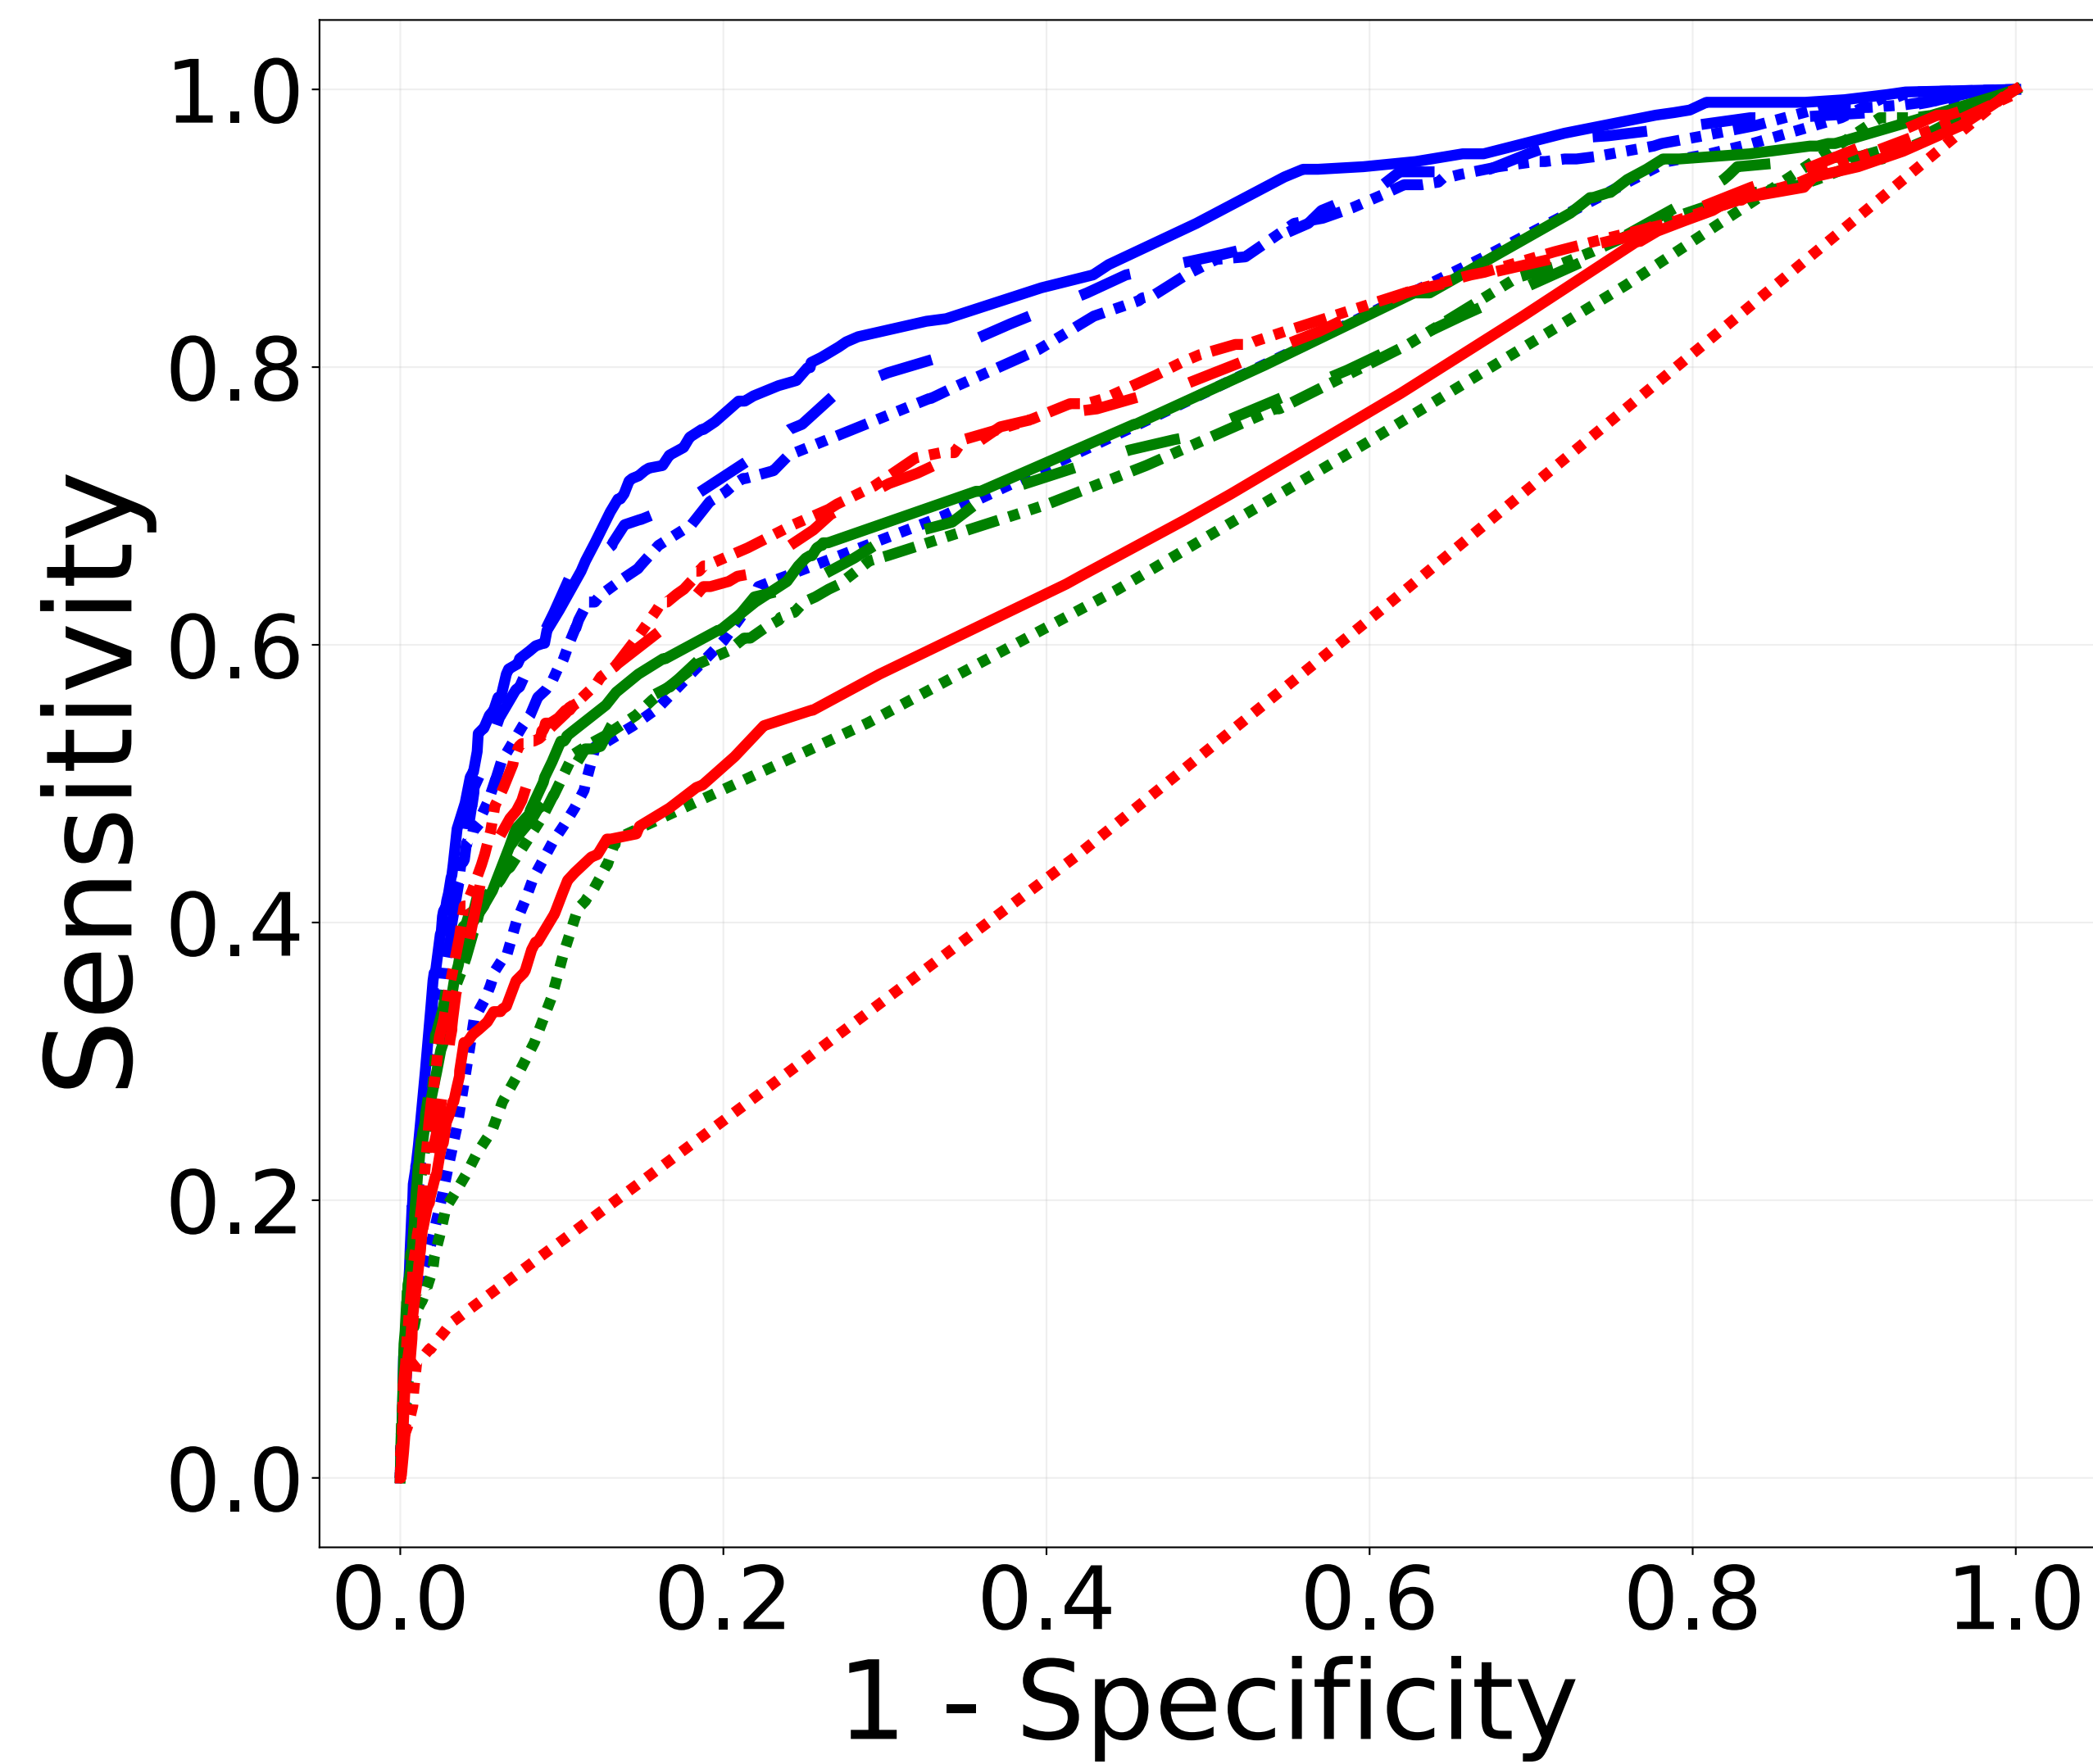

Methodist ICU

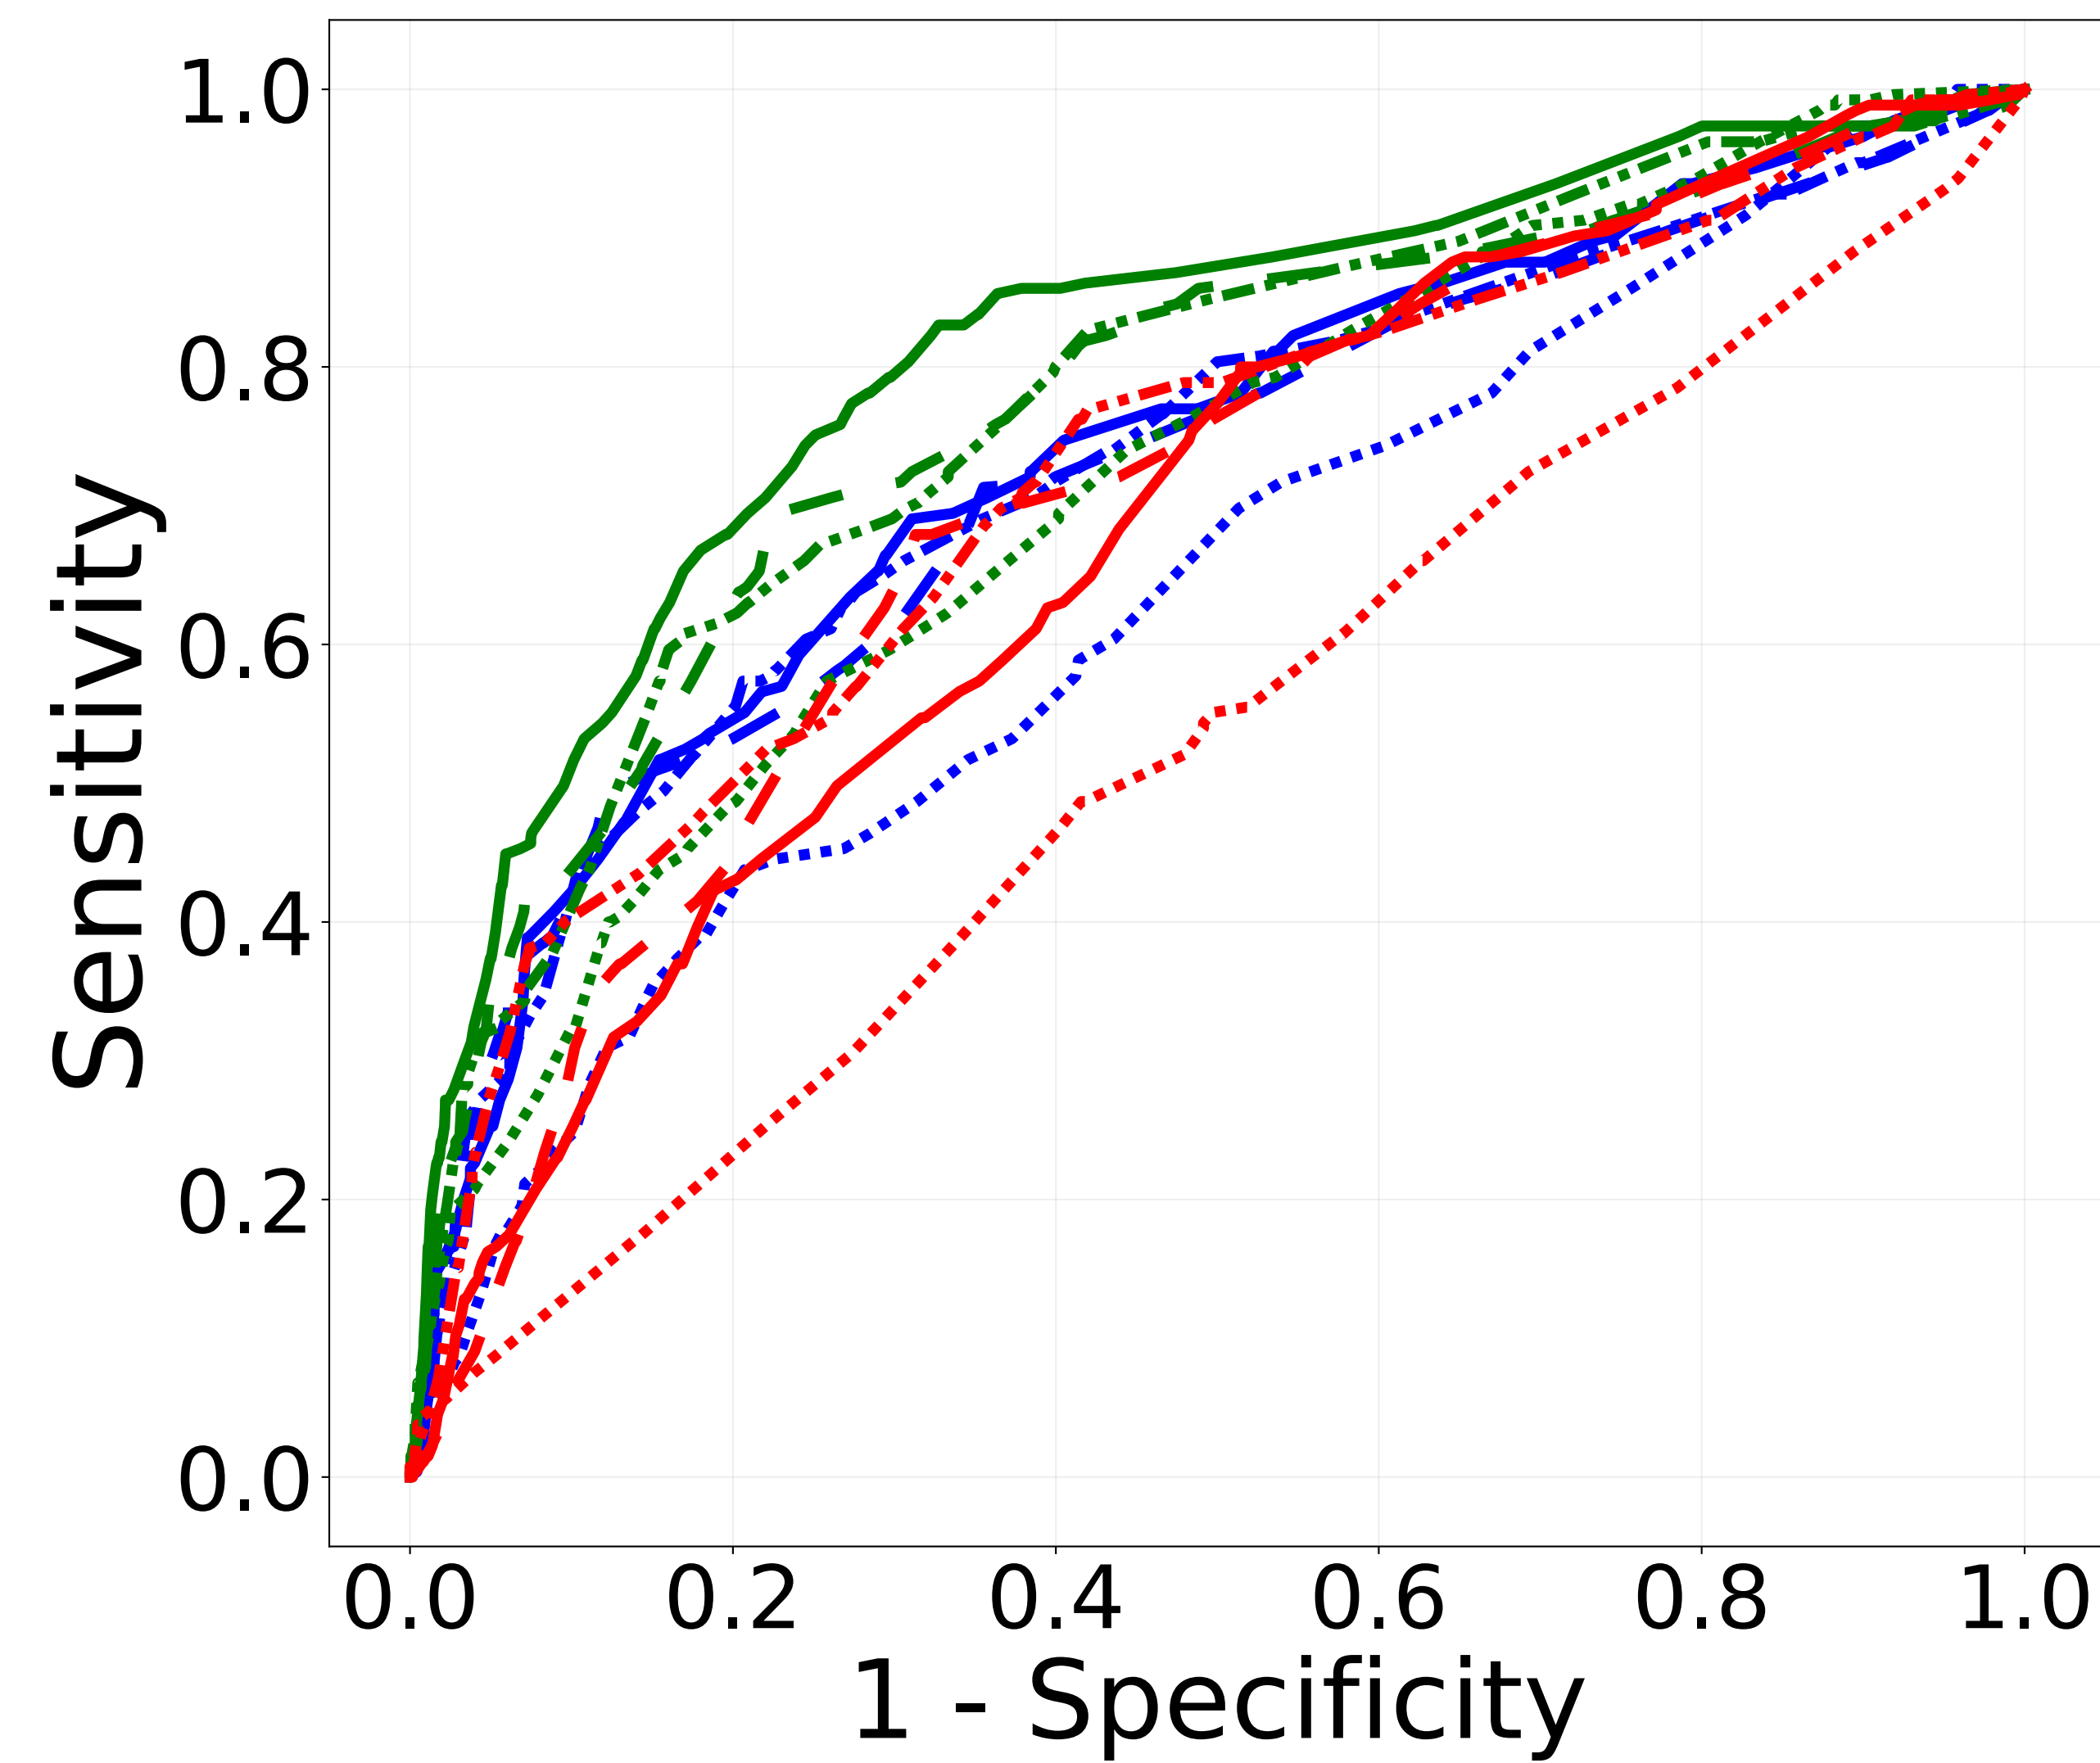

Beth Israel ICU

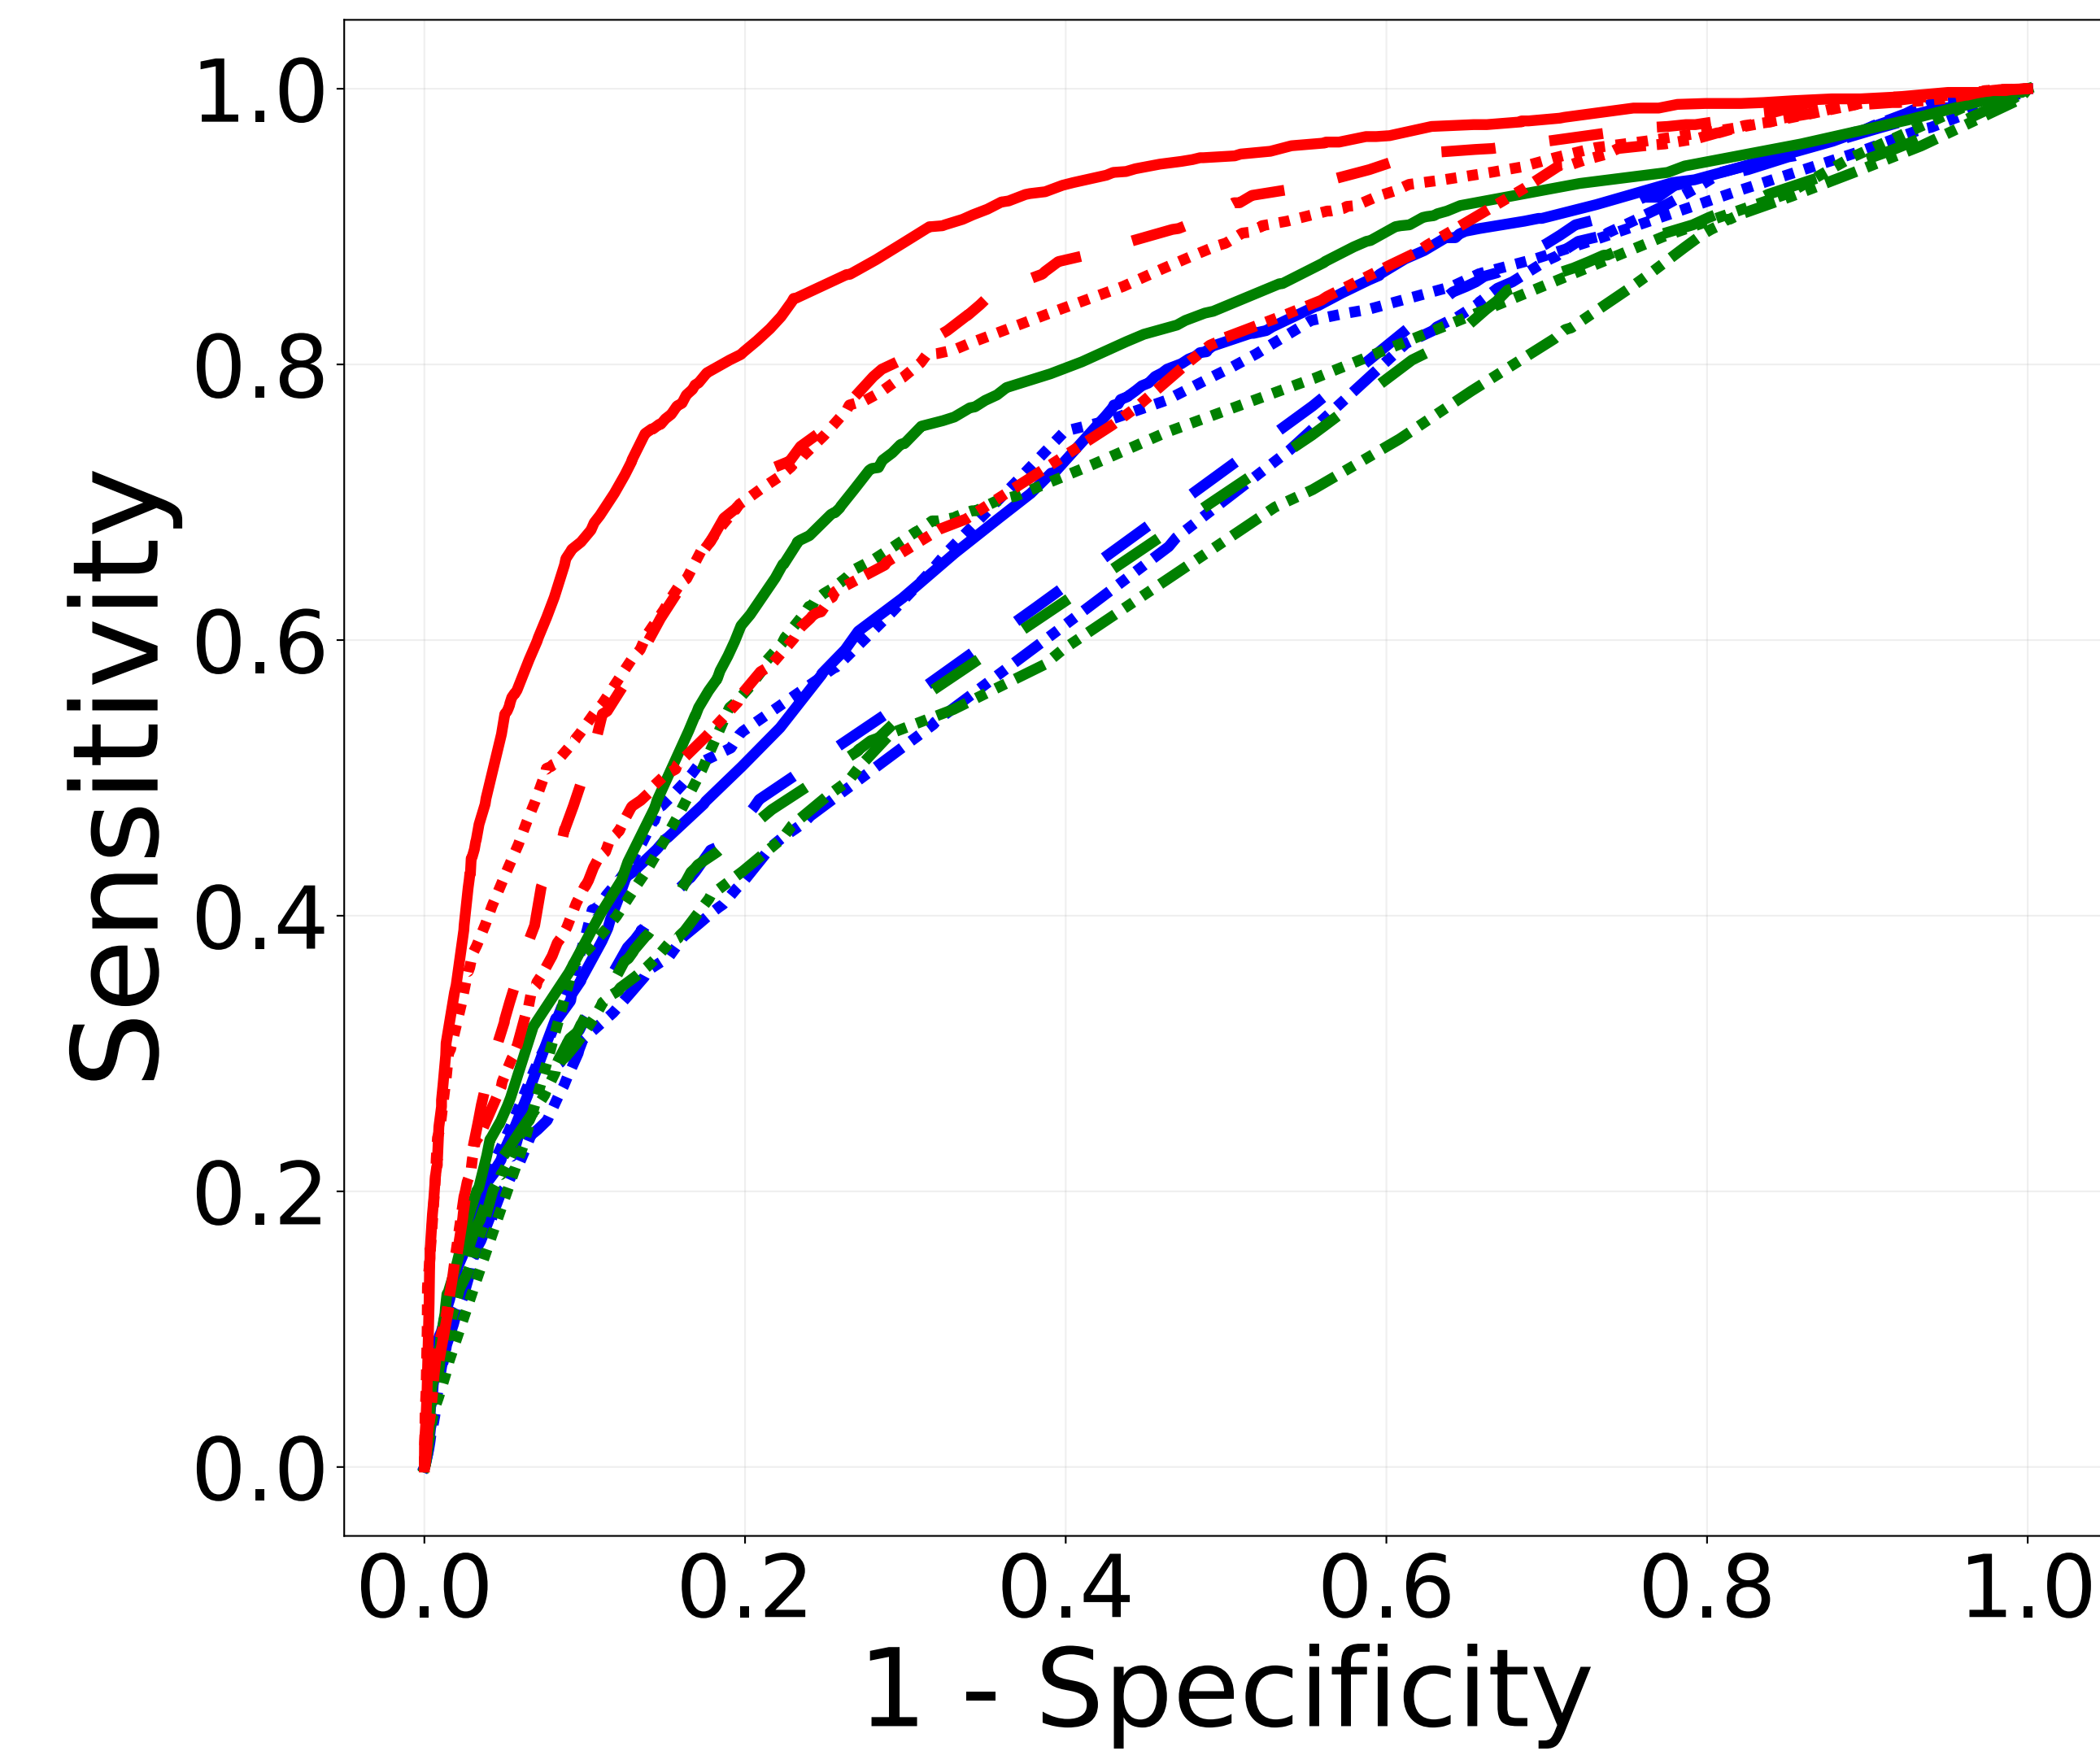

## Models

- A-1
- ⋯ A-2
- - A-3
- · A-4
- B-1
- ⋯ B-2
- - B-3
- · B-4
- C-1
- ⋯ C-2
- - C-3
- · C-4

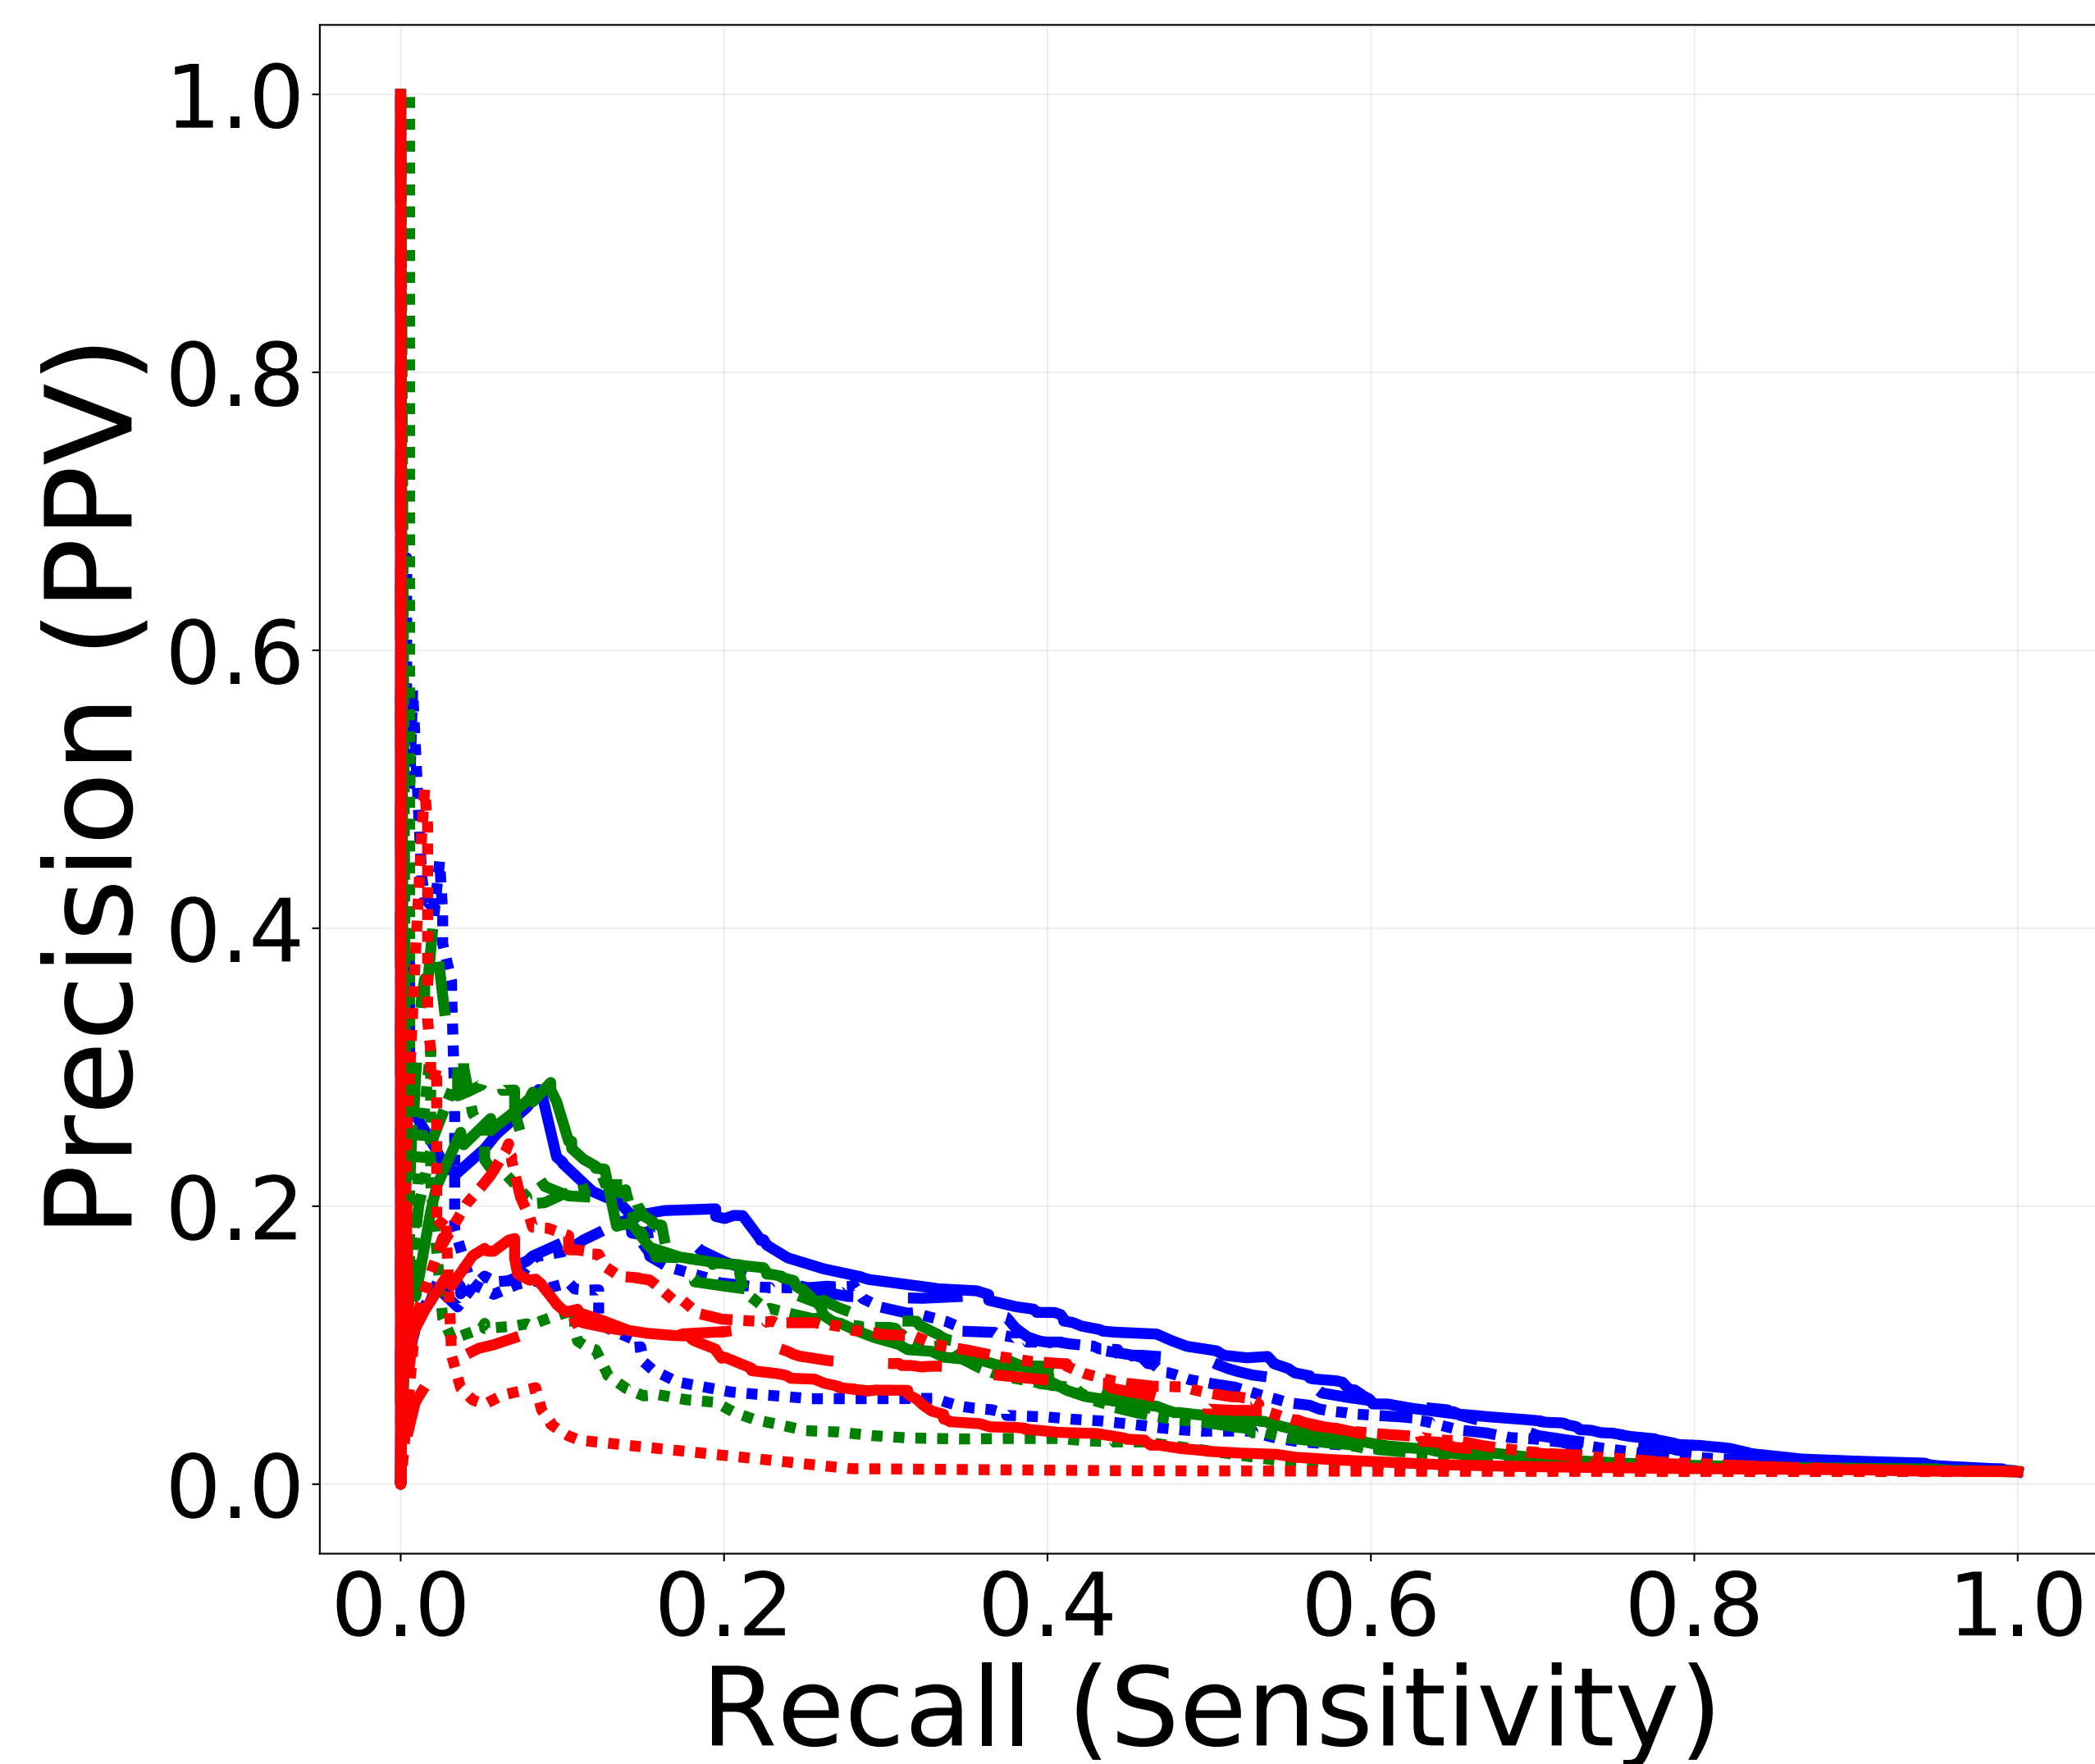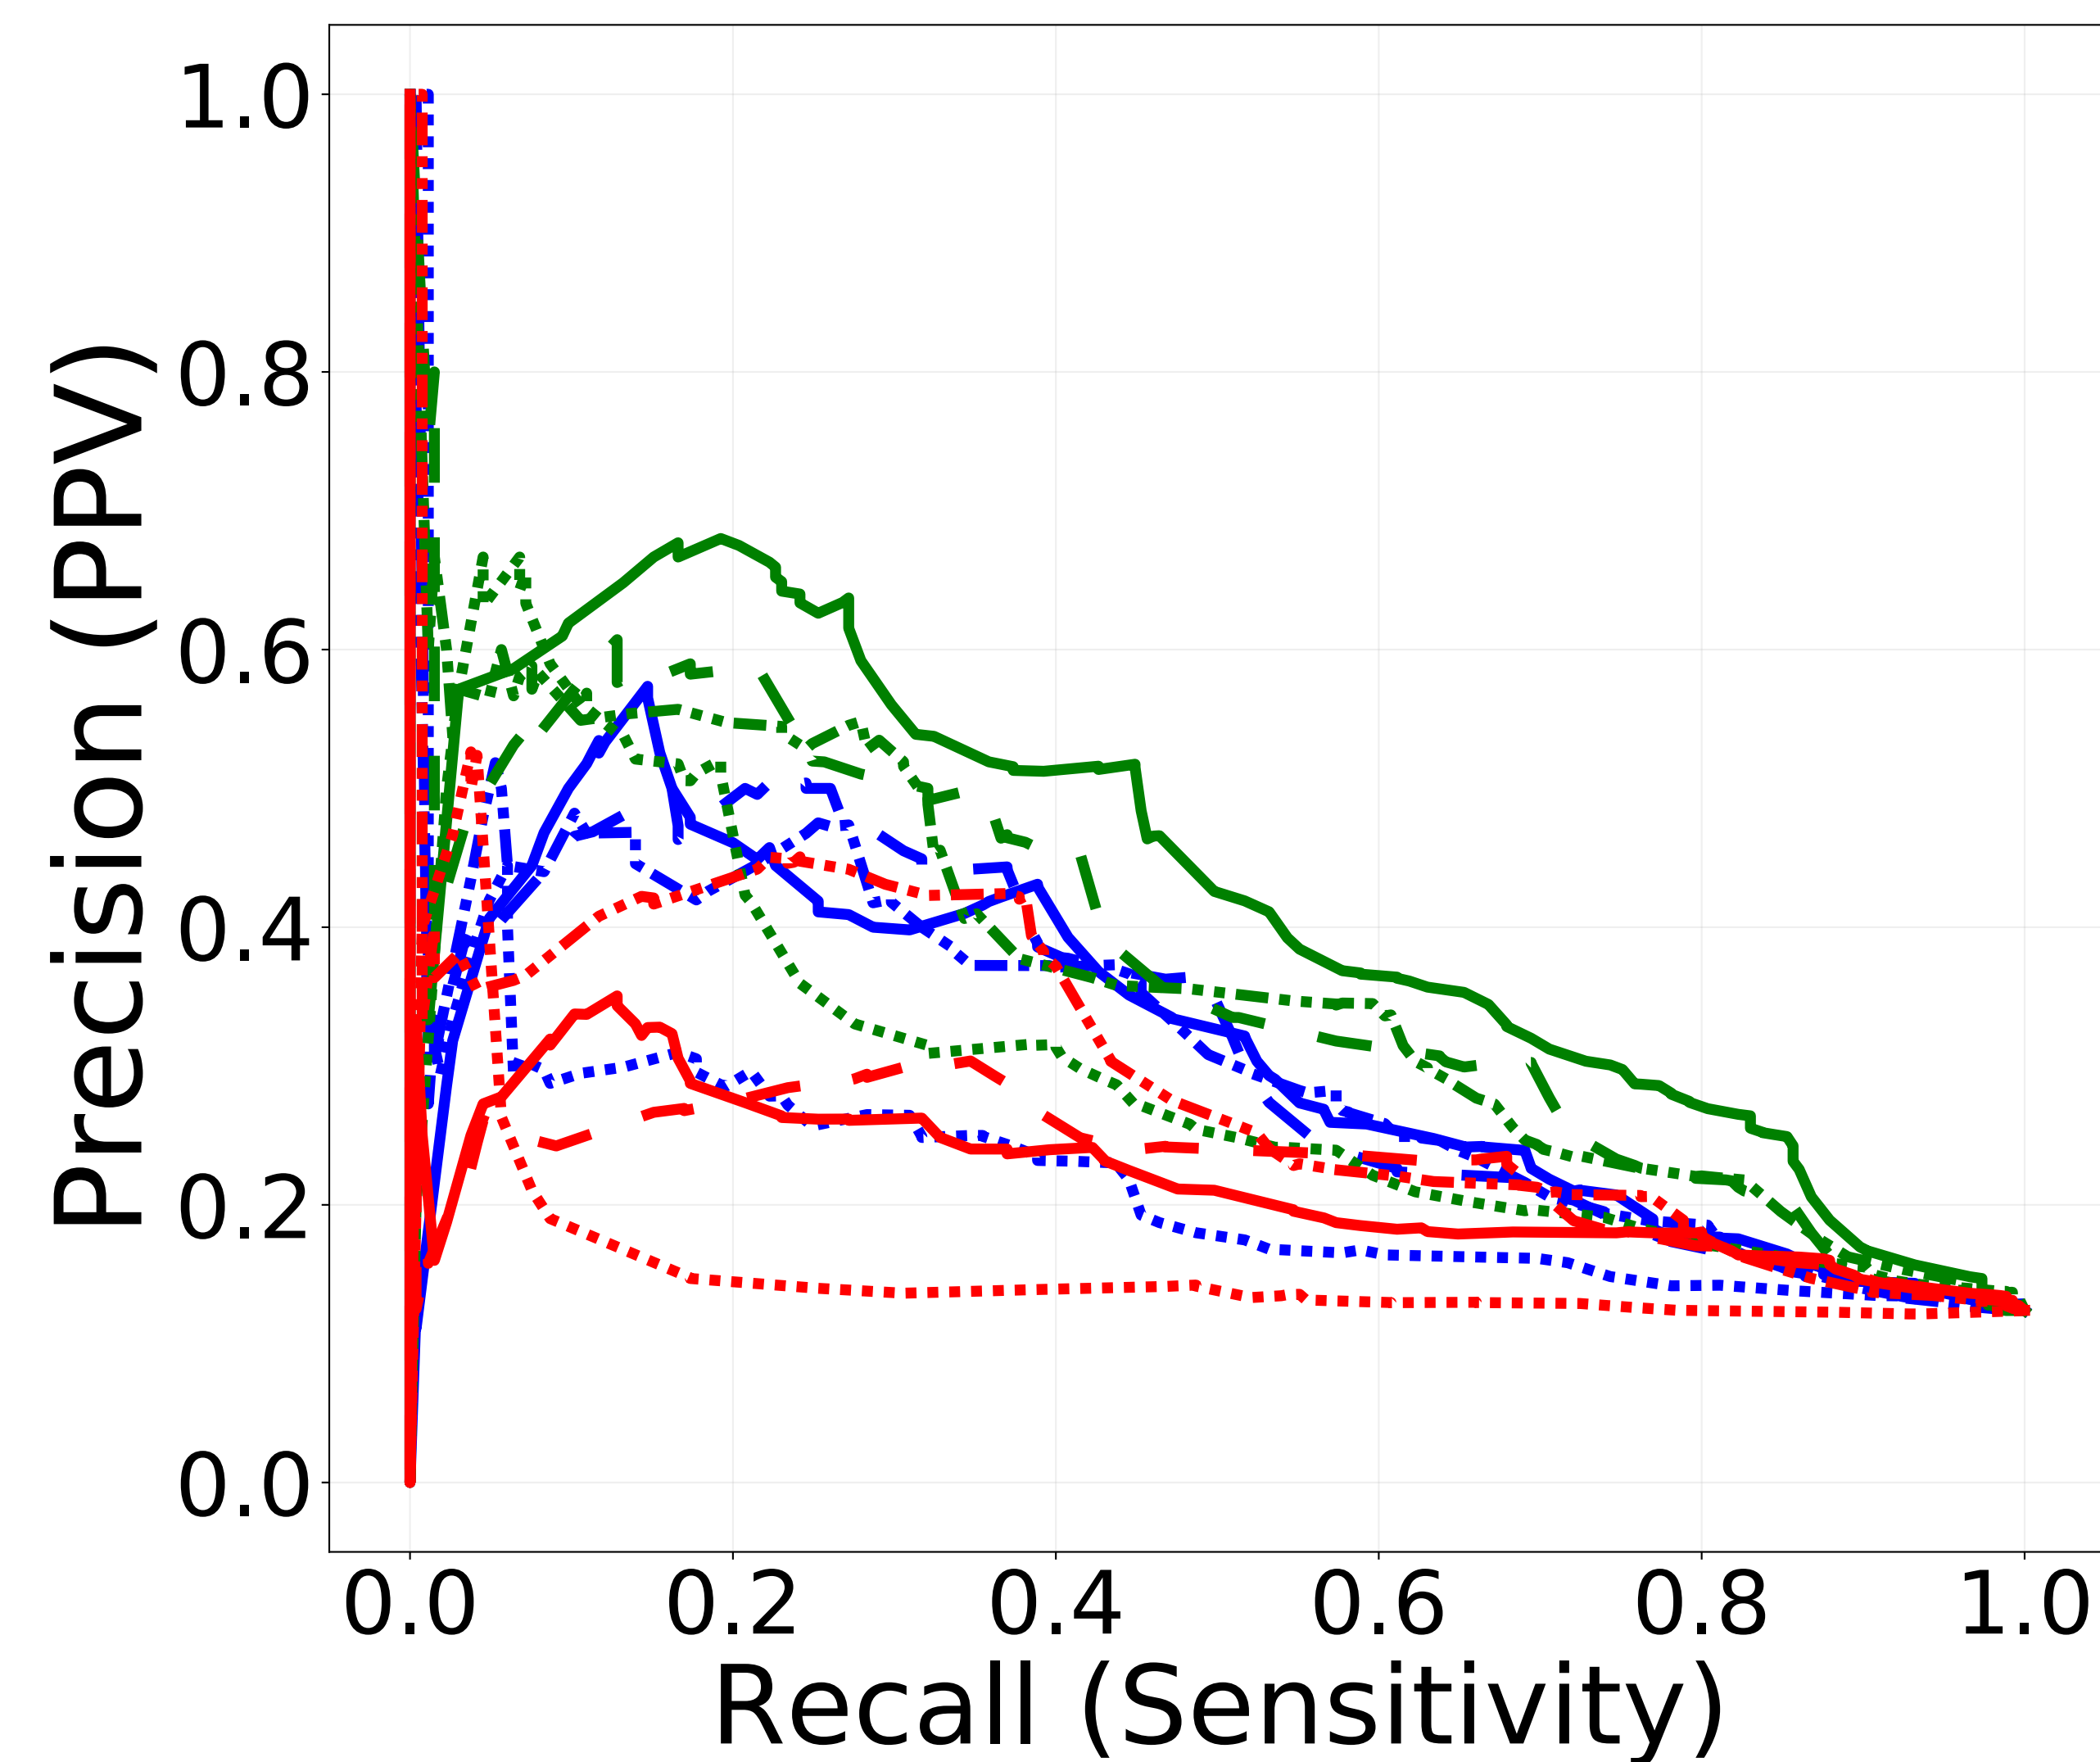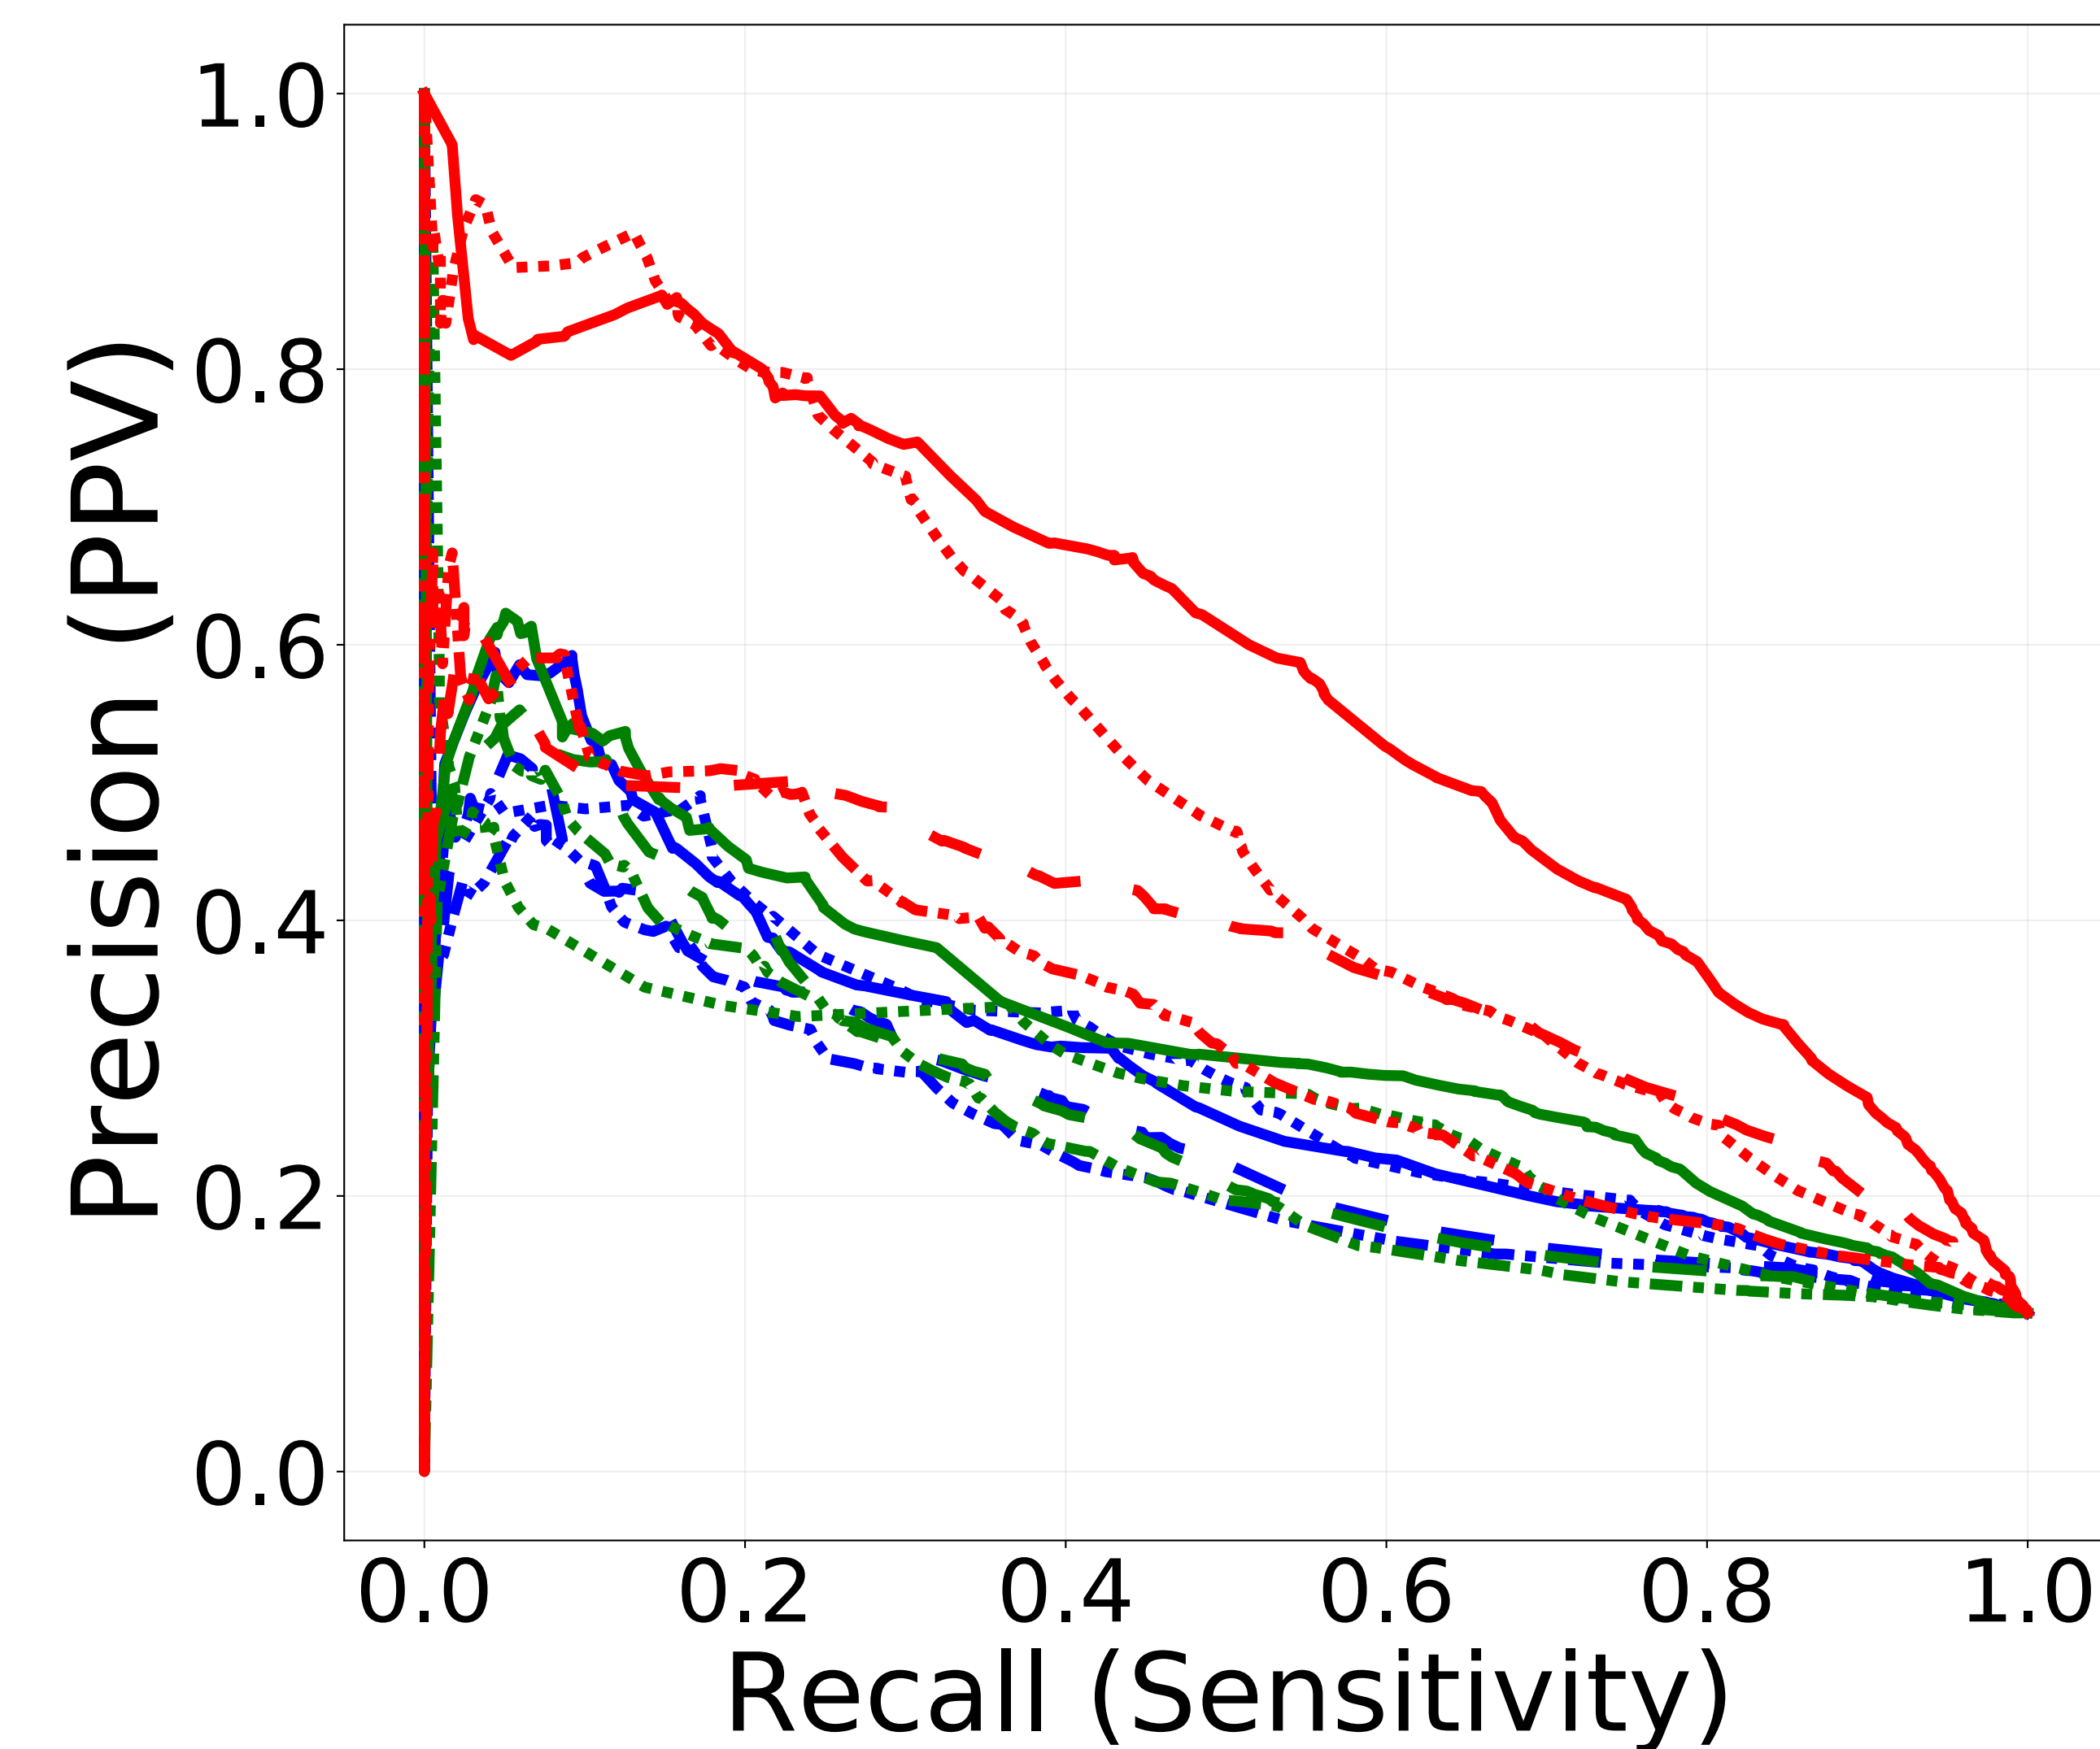

| Section/Topic                | Item | Checklist Item                                                                                                                                                                                        | Page                       |
|------------------------------|------|-------------------------------------------------------------------------------------------------------------------------------------------------------------------------------------------------------|----------------------------|
| <b>Title and abstract</b>    |      |                                                                                                                                                                                                       |                            |
| Title                        | 1    | Identify the study as developing and/or validating a multivariable prediction model, the target population, and the outcome to be predicted.                                                          | 1                          |
| Abstract                     | 2    | Provide a summary of objectives, study design, setting, participants, sample size, predictors, outcome, statistical analysis, results, and conclusions.                                               | 3-4                        |
| <b>Introduction</b>          |      |                                                                                                                                                                                                       |                            |
| Background and objectives    | 3a   | Explain the medical context (including whether diagnostic or prognostic) and rationale for developing or validating the multivariable prediction model, including references to existing models.      | 5-6                        |
|                              | 3b   | Specify the objectives, including whether the study describes the development or validation of the model or both.                                                                                     | 5-6                        |
| <b>Methods</b>               |      |                                                                                                                                                                                                       |                            |
| Source of data               | 4a   | Describe the study design or source of data (e.g., randomized trial, cohort, or registry data), separately for the development and validation data sets, if applicable.                               | 6-7                        |
|                              | 4b   | Specify the key study dates, including start of accrual; end of accrual; and, if applicable, end of follow-up.                                                                                        | 6-7                        |
| Participants                 | 5a   | Specify key elements of the study setting (e.g., primary care, secondary care, general population) including number and location of centres.                                                          | 6-7                        |
|                              | 5b   | Describe eligibility criteria for participants.                                                                                                                                                       | 6-7                        |
|                              | 5c   | Give details of treatments received, if relevant.                                                                                                                                                     | N/A                        |
| Outcome                      | 6a   | Clearly define the outcome that is predicted by the prediction model, including how and when assessed.                                                                                                | 6-7; Table E1              |
|                              | 6b   | Report any actions to blind assessment of the outcome to be predicted.                                                                                                                                | N/A                        |
| Predictors                   | 7a   | Clearly define all predictors used in developing or validating the multivariable prediction model, including how and when they were measured.                                                         | 6-7, Table E2              |
|                              | 7b   | Report any actions to blind assessment of predictors for the outcome and other predictors.                                                                                                            | N/A                        |
| Sample size                  | 8    | Explain how the study size was arrived at.                                                                                                                                                            | 6-8                        |
| Missing data                 | 9    | Describe how missing data were handled (e.g., complete-case analysis, single imputation, multiple imputation) with details of any imputation method.                                                  | 7                          |
| Statistical analysis methods | 10a  | Describe how predictors were handled in the analyses.                                                                                                                                                 | 6-8                        |
|                              | 10b  | Specify type of model, all model-building procedures (including any predictor selection), and method for internal validation.                                                                         | 6-8                        |
|                              | 10d  | Specify all measures used to assess model performance and, if relevant, to compare multiple models.                                                                                                   | 8                          |
| Risk groups                  | 11   | Provide details on how risk groups were created, if done.                                                                                                                                             | N/A                        |
| <b>Results</b>               |      |                                                                                                                                                                                                       |                            |
| Participants                 | 13a  | Describe the flow of participants through the study, including the number of participants with and without the outcome and, if applicable, a summary of the follow-up time. A diagram may be helpful. | 8, Figure E1               |
|                              | 13b  | Describe the characteristics of the participants (basic demographics, clinical features, available predictors), including the number of participants with missing data for predictors and outcome.    | 8, Table 1                 |
| Model development            | 14a  | Specify the number of participants and outcome events in each analysis.                                                                                                                               | 8, Table 1                 |
|                              | 14b  | If done, report the unadjusted association between each candidate predictor and outcome.                                                                                                              | N/A                        |
| Model specification          | 15a  | Present the full prediction model to allow predictions for individuals (i.e., all regression coefficients, and model intercept or baseline survival at a given time point).                           | Figure 3                   |
|                              | 15b  | Explain how to use the prediction model.                                                                                                                                                              | 8-12                       |
| Model performance            | 16   | Report performance measures (with CIs) for the prediction model.                                                                                                                                      | 8-12, Figures 1, 2, E3, E4 |
| <b>Discussion</b>            |      |                                                                                                                                                                                                       |                            |
| Limitations                  | 18   | Discuss any limitations of the study (such as nonrepresentative sample, few events per predictor, missing data).                                                                                      | 13                         |
| Interpretation               | 19b  | Give an overall interpretation of the results, considering objectives, limitations, and results from similar studies, and other relevant evidence.                                                    | 8-12                       |
| Implications                 | 20   | Discuss the potential clinical use of the model and implications for future research.                                                                                                                 | 8-12                       |
| <b>Other information</b>     |      |                                                                                                                                                                                                       |                            |
| Supplementary information    | 21   | Provide information about the availability of supplementary resources, such as study protocol, Web calculator, and data sets.                                                                         | N/A                        |
| Funding                      | 22   | Give the source of funding and the role of the funders for the present study.                                                                                                                         | 1-2                        |
